# Supplementary material for: Phylodynamics and Coat Protein Analysis of Babaco Mosaic Virus in Ecuador
Source: MDPI journal article supplement (doi:10.3390/plants11131646), 2022-06-22
Supplement: s1 [file s1]

Codon Alignment View

| | | | |

MF978248|Pichincha|2

ATGAGTGGAAAGTCAGAGTCATCCAACACTGGAAACTCCCCCTTCCCAAATCTCACTAAA 60

\_M\_S\_G\_K\_S\_E\_S\_S\_N\_T\_G\_N\_S\_P\_F\_P\_N\_L\_T\_K\_

MT240490|Imbabura|20

ATGAGTGGAAAATCAGAGTCATCCAACACTGGAAACTCCCCCTTCCCAAGTCTCACTAAA

\_M\_S\_G\_K\_S\_E\_S\_S\_N\_T\_G\_N\_S\_P\_F\_P\_S\_L\_T\_K\_

MT240491|Imbabura|20

ATGAGTGGAAAATCAGAGTCATCCAACACTGGAAACTCCCCCTTCCCAAGTCTCACTAAA

\_M\_S\_G\_K\_S\_E\_S\_S\_N\_T\_G\_N\_S\_P\_F\_P\_S\_L\_T\_K\_

MT240492|Imbabura|20

ATGAGTGGAAAATCAGAGTCATCCAACACTGGAAACTCCCCCTTCCCAAGTCTCACTAAA

\_M\_S\_G\_K\_S\_E\_S\_S\_N\_T\_G\_N\_S\_P\_F\_P\_S\_L\_T\_K\_

MT240493|Imbabura|20

ATGAGTGGAAAATCAGAGTCATCCAACACTGGAAATTTCCCCCTTCCCAAGTCTCACTAAA

\_M\_S\_G\_K\_S\_E\_S\_S\_N\_T\_G\_N\_S\_P\_F\_P\_S\_L\_T\_K\_

MT240494|Pichincha|2

ATGAGTGGAAAGTCAGAGTCATCCAACACTGGAAACTCCCCCTTCCCAAATCTCACTAAA

\_M\_S\_G\_K\_S\_E\_S\_S\_N\_T\_G\_N\_S\_P\_F\_P\_N\_L\_T\_K\_

MT240495|Pichincha|2

ATGAGTGGAAAATCAGAGTCATCTAACATTGGAAACTCCCCTTTCCCAAACATCACTAAA

\_M\_S\_G\_K\_S\_E\_S\_S\_N\_I\_G\_N\_S\_P\_F\_P\_N\_I\_T\_K\_

MT240496|Tungurahua|

ATGAGTGGAAAGTCAGAGTCATCCAACACTGGAAACTCCCCCTTCCCAAGCCTCACTAAA

\_M\_S\_G\_K\_S\_E\_S\_S\_N\_T\_G\_N\_S\_P\_F\_P\_S\_L\_T\_K\_

MT240497|Tungurahua|

ATGGGTGAAAAATCAGAGTCATCCAACACTGGAAACCTCCCCTTCCCAAATCTCACCAAA

\_M\_G\_E\_K\_S\_E\_S\_S\_N\_T\_G\_N\_L\_P\_F\_P\_N\_L\_T\_K\_

MT240498|Tungurahua|

ATGAGTGGAAAGTCAGAGTCATCCAACACTGGAAGCTCCCCCTTCCCAAACCTCACTAAA

\_M\_S\_G\_K\_S\_E\_S\_S\_N\_T\_G\_S\_S\_P\_F\_P\_N\_L\_T\_K\_

MT240499|Tungurahua|

ATGAGTGGAAAGTCAGAGTCATCCAACACTGGAAGCTCCCCCTTCCCAAACCTCACTAAA

\_M\_S\_G\_K\_S\_E\_S\_S\_N\_T\_G\_S\_S\_P\_F\_P\_N\_L\_T\_K\_

MT240500|Tungurahua|

ATGAGTGGGAAGTCAGAGTCATCCAACGCTGGGAACTCCCCCTTCCCAAATCTTACCAAA

\_M\_S\_G\_K\_S\_E\_S\_S\_N\_A\_G\_N\_S\_P\_F\_P\_N\_L\_T\_K\_

MT240501|Tungurahua|

ATGAGTGGAAAGTCAGAGTCATCCAACACTGGAAACTCCCCCTTCCCAAATCTCACTAAA

\_M\_S\_G\_K\_S\_E\_S\_S\_N\_T\_G\_N\_S\_P\_F\_P\_N\_L\_T\_K\_

MT240502|Tungurahua|

ATGAGTGGAAAATCAGAGTCATCAAACACTGGAAACTCCCCCTTCCCAAATCTCACCAAAA

\_M\_S\_G\_K\_S\_E\_S\_S\_N\_T\_G\_N\_S\_P\_F\_P\_N\_L\_T\_K\_

MT240503|Tungurahua|

ATGAGTGGAAAGTCAGAGTCATCCAACACTGGAAACTCCCCCTTCCCAAATCTCACTAAA

\_M\_S\_G\_K\_S\_E\_S\_S\_N\_T\_G\_N\_S\_P\_F\_P\_N\_L\_T\_K\_

MT240504|Tungurahua|

ATGAGTGGAAAATCAGAGTCATCAAACACTGGAAACTCCCCCTTCCCAAATCTCACCAAAA

\_M\_S\_G\_K\_S\_E\_S\_S\_N\_T\_G\_N\_S\_P\_F\_P\_N\_L\_T\_K\_

MT240505|Azuay|2017|

ATGAGTGGAAAATCAGAGTCATCAAACACTGGAAACTCCCCCTTCCCAAATCTCACTAAA

\_M\_S\_G\_K\_S\_E\_S\_S\_N\_T\_G\_N\_S\_P\_F\_P\_N\_L\_T\_K\_

MT240506|Azuay|2017|

ATGAGTGGAAAATCAGAGTCATCAAACACTGGAAACTCCCCCTTCCCAAATCTCACTAAA

\_M\_S\_G\_K\_S\_E\_S\_S\_N\_T\_G\_N\_S\_P\_F\_P\_N\_L\_T\_K\_

MT240507|Loja|2017|B

ATGAGTGGAAAATCAGAGTCATCAAACACTGGAAACTCCCCCTTCCCAAATCTCACTAAA

\_M\_S\_G\_K\_S\_E\_S\_S\_N\_T\_G\_N\_S\_P\_F\_P\_N\_L\_T\_K\_

MT240508|Loja|2017|B

ATGAGTGGAAAATCAGAGTCATCAAACACTGGAAACTCCCCCTTCCCAAATCTCACTAAA

\_M\_S\_G\_K\_S\_E\_S\_S\_N\_T\_G\_N\_S\_P\_F\_P\_N\_L\_T\_K\_

MT240509|Loja|2017|B

ATGAGTGGAAAATCAGAGTCATCAAACACTGGAAACTCCCCCTTCCCAAATCTCACTAAA

\_M\_S\_G\_K\_S\_E\_S\_S\_N\_T\_G\_N\_S\_P\_F\_P\_N\_L\_T\_K\_

MT240510|Loja|2017|B

ATGAGTGGAAAATCAGAGTCATCAAACACTGGAAACTCCCCCTTCCCAAATCTCACTAAA

\_M\_S\_G\_K\_S\_E\_S\_S\_N\_T\_G\_N\_S\_P\_F\_P\_N\_L\_T\_K\_

MT240511|Loja|2017|B

ATGAGTGGAAAATCAGAGTCATCAAACACTGGAAACTCCCCCTTCCCAAATCTCACTAAA

\_M\_S\_G\_K\_S\_E\_S\_S\_N\_T\_G\_N\_S\_P\_F\_P\_N\_L\_T\_K\_

MT240512|Azuay|2016|

ATGAGTGGAAAATCAGAGTCATCCAACACTGGAAACCCCCCTTTCCCAAACCTCACTAAA

\_M\_S\_G\_K\_S\_E\_S\_S\_N\_T\_G\_N\_P\_P\_F\_P\_N\_L\_T\_K\_

MT240513|Azuay|2016|

ATGAGTGGAAAATCAGAGTCATCCAACACTGGAAACCCCCCTTCCCAAACCTCACCAAA  
\_M\_S\_G\_K\_S\_E\_S\_S\_N\_T\_G\_N\_P\_P\_F\_P\_N\_L\_T\_K\_

MT240514|Azuay|2016|

ATGAGTGGAAAATCAGAGTCATCCAACATTGGAAACTTCCCCTTCCCAAATCTCACCAAA  
\_M\_S\_G\_K\_S\_E\_S\_S\_N\_I\_G\_N\_F\_P\_F\_P\_N\_L\_T\_K\_

MZ490607|Tungurahua|

ATGAGTGGAAAGTCAGAGTCATCCAACACTGGAAACTCCCCCTTCCCAAGCCTCACTAAA  
\_M\_S\_G\_K\_S\_E\_S\_S\_N\_T\_G\_N\_S\_P\_F\_P\_S\_L\_T\_K\_

MZ490608|Tungurahua|

ATGAGTGGAAAGTCAGAGTCATCCAACACTGGAAACTCCCCCTTCCCAAGCCTCACTAAA  
\_M\_S\_G\_K\_S\_E\_S\_S\_N\_T\_G\_N\_S\_P\_F\_P\_S\_L\_T\_K\_

MZ490609|Tungurahua|

ATCAGAGTCGTCCAACACTGGAAACTCCCCCTTCCCAAATCTCACTAAA  
\_ \_ \_ \_ \_ # \_S\_E\_S\_S\_N\_T\_G\_N\_S\_P\_F\_P\_N\_L\_T\_K\_

MZ490610|Tungurahua|

ATGAGTGGAAAGTCAGAGTCATCCAACACTGGAAACTCCCCCTTCCCAAACCTCACCAAA  
\_M\_S\_G\_K\_S\_E\_S\_S\_N\_T\_G\_N\_S\_P\_F\_P\_N\_L\_T\_K\_

MZ490611|Tungurahua|

ATGAGTGGAAAGTCAGAGTCATCCAACACTGGAAACTCCCCCTTCCCAAACCTCACCAAA  
\_M\_S\_G\_K\_S\_E\_S\_S\_N\_T\_G\_N\_S\_P\_F\_P\_N\_L\_T\_K\_

MZ490612|Tungurahua|

ATGAGTGGGAAATCGGAGTCAGCCAACACCGGAAACTCCCCCTTTCCAAATATCACTAAA  
\_M\_S\_G\_K\_S\_E\_S\_A\_N\_T\_G\_N\_S\_P\_F\_P\_N\_I\_T\_K\_

OL771197|Pichincha|2

ATGAGTGGAAAATCAGAGTCATCAAACACTGGAAACTTCCCCTTCCCAAATCTCACTAAA  
\_M\_S\_G\_K\_S\_E\_S\_S\_N\_T\_G\_N\_F\_P\_F\_P\_N\_L\_T\_K\_

OL771198|Pichincha|2

ATGAGTGGAAAATCAGAGTCATCAAACACTGGAAACTTCCCCTTCCCAAATCTCACTAAA  
\_M\_S\_G\_K\_S\_E\_S\_S\_N\_T\_G\_N\_F\_P\_F\_P\_N\_L\_T\_K\_

OL771199|Pichincha|2

ATGAGTGGAAAATCAGAGTCATCCAACATTGGAAACTCCCCCTTCCCAAATCTCACCAAA  
\_M\_S\_G\_K\_S\_E\_S\_S\_N\_I\_G\_N\_S\_P\_F\_P\_N\_L\_T\_K\_

OL771200|Pichincha|2

ATGAGTGGAAAATCAGAATCATCCAACATTGGAAACTCCCCTTTTCCAAATATCACTAAA  
\_M\_S\_G\_K\_S\_E\_S\_S\_N\_I\_G\_N\_S\_P\_F\_P\_N\_I\_T\_K\_

| | | | |

MF978248|Pichincha|2

GAGACAATGGCCAGCTTCAACTTCAAACCAAGTTCAAACCTTGCTACCTAGCGAGGAAGAG 120

\_E\_T\_M\_A\_S\_F\_N\_F\_K\_P\_S\_S\_N\_L\_L\_P\_S\_E\_E\_E\_

MT240490|Imbabura|20

GAGACAATGGCCAGCTTCAACTTCAAACCAAGTTCAAACCTTGCTACCTAGCGAGGAAGAG

\_E\_T\_M\_A\_S\_F\_N\_F\_K\_P\_S\_S\_N\_L\_L\_P\_S\_E\_E\_E\_

MT240491|Imbabura|20

GAAACAATGGCCAGCTTCAACTTCAAACCAAGTTCAAACCTTGCTACCTAGCGAGGAAGAG

\_E\_T\_M\_A\_S\_F\_N\_F\_K\_P\_S\_S\_N\_L\_L\_P\_S\_E\_E\_E\_

MT240492|Imbabura|20

GAGACAATGGCCAGCTTCAACTTCAAACCAAGTTCAAACCTTGCTACCTAGCGAGGAAGAG

\_E\_T\_M\_A\_S\_F\_N\_F\_K\_P\_S\_S\_N\_L\_L\_P\_S\_E\_E\_E\_

MT240493|Imbabura|20

GAGACAATGGCCAGCTTTAACCTCAAACCAAGTTCAAACCTTGCTACCTAGCGAGGAAGAG

\_E\_T\_M\_A\_S\_F\_N\_L\_K\_P\_S\_S\_N\_L\_L\_P\_S\_E\_E\_E\_

MT240494|Pichincha|2

GAGACAATGGCCAACTTCAACTTCAAACCAAGTTCAAACCTTGCTGCCCAGCGAGGAAGAG

\_E\_T\_M\_A\_N\_F\_N\_F\_K\_P\_S\_S\_N\_L\_L\_P\_S\_E\_E\_E\_

MT240495|Pichincha|2

GAGACAATGGCCAGCTTTAATTTTAAACCAAGTTCAAATTTGCTGCCTAGCGAGGATGAG

\_E\_T\_M\_A\_S\_F\_N\_F\_K\_P\_S\_S\_N\_L\_L\_P\_S\_E\_D\_E\_

MT240496|Tungurahua|

GAGACGATGGCCAGCTTCAACTTTAAACCAAGTTCAAACCTTGCTACCTAGCGAGGAAGAG

\_E\_T\_M\_A\_S\_F\_N\_F\_K\_P\_S\_S\_N\_L\_L\_P\_S\_E\_E\_E\_

MT240497|Tungurahua|

GAGACAATGGCCAGCTTCAACTTCAAACCAAGTTCAAACCTTGCTACCTAGCCAGGAAGAG

\_E\_T\_M\_A\_S\_F\_N\_F\_K\_P\_S\_S\_N\_L\_L\_P\_S\_Q\_E\_E\_

MT240498|Tungurahua|

GAGACGATGGCCAGCTTCAACCTCAAACCAAGTTCAAACCTTGCTGCCTAGCGAGGAGGAG

\_E\_T\_M\_A\_S\_F\_N\_L\_K\_P\_S\_S\_N\_L\_L\_P\_S\_E\_E\_E\_

MT240499|Tungurahua|

GAGACAATGGCCAGCTTCAACCTCAAACCAAGTTCAAACCTTGCTGCCTAGCGAGGAGGAG

\_E\_T\_M\_A\_S\_F\_N\_L\_K\_P\_S\_S\_N\_L\_L\_P\_S\_E\_E\_E\_

MT240500|Tungurahua|

GAGACAATGGCCAGCTTCAACTTCAAACCAAGTTCAAACCTTGCTACCTAGCGAGGAAGAG

\_E\_T\_M\_A\_S\_F\_N\_F\_K\_P\_S\_S\_N\_L\_L\_P\_S\_E\_E\_E\_

MT240501|Tungurahua|

GAGACAATGGCCAGCTTCAACTTCAAACCAAGTTCAAACCTTGCTACCTAGCGAGGAAGAG

\_E\_T\_M\_A\_S\_F\_N\_F\_K\_P\_S\_S\_N\_L\_L\_P\_S\_E\_E\_E\_

MT240502|Tungurahua|

GAGACAATGGCTAGCTTCAATTTCAAACCGAGTTCAAACCTTGCTGCCCAGCGAGGACGAG

\_E\_T\_M\_A\_S\_F\_N\_F\_K\_P\_S\_S\_N\_L\_L\_P\_S\_E\_D\_E\_

MT240503|Tungurahua|

GAGACAATGGCCAACTTCAACTTCAAACCAAGTTCAAACCTTGCTACCTAGCGAGGAAGAG

\_E\_T\_M\_A\_N\_F\_N\_F\_K\_P\_S\_S\_N\_L\_L\_P\_S\_E\_E\_E\_

MT240504|Tungurahua|

GAGACAATGGCTAGCTTCAATTTCAAACCGAGTTCAAACCTTGCTGCCCAGCGAGGACGAG

\_E\_T\_M\_A\_S\_F\_N\_F\_K\_P\_S\_S\_N\_L\_L\_P\_S\_E\_D\_E\_

MT240505|Azuay|2017|

GAGACAATGGCCAGCTTCAACTTCAAACCAAGTTCAAACCTTGCTACCTAGCGAGGAAGAG

\_E\_T\_M\_A\_S\_F\_N\_F\_K\_P\_S\_S\_N\_L\_L\_P\_S\_E\_E\_E\_

MT240506|Azuay|2017|

GAGACAATGGCCAGCTTCAACTTCAAACCAAGTTCAAACCTTGCTACCTAGCGAGGAAGAG

\_E\_T\_M\_A\_S\_F\_N\_F\_K\_P\_S\_S\_N\_L\_L\_P\_S\_E\_E\_E\_

MT240507|Loja|2017|B

GAGACAATGGCCAGCTTCAACTTCAAACCAAGTTCAAACCTTGCTACCTAGCGAGGAAGAG

\_E\_T\_M\_A\_S\_F\_N\_F\_K\_P\_S\_S\_N\_L\_L\_P\_S\_E\_E\_E\_

MT240508|Loja|2017|B

GAGACAATGGCCAGCTTCAACTTCAAACCAAGTTCAAACCTTGCTACCTAGCGAGGAAGAG

\_E\_T\_M\_A\_S\_F\_N\_F\_K\_P\_S\_S\_N\_L\_L\_P\_S\_E\_E\_E\_

MT240509|Loja|2017|B

GAGACAATGGCCAGCTTCAACTTCAAACCAAGTTCAAACCTTGCTACCTAGCGAGGAAGAG

\_E\_T\_M\_A\_S\_F\_N\_F\_K\_P\_S\_S\_N\_L\_L\_P\_S\_E\_E\_E\_

MT240510|Loja|2017|B

GAGACAATGGCCAGCTTCAACTTCAAACCAAGTTCAAACCTTGCTACCTAGCGAGGAAGAG

\_E\_T\_M\_A\_S\_F\_N\_F\_K\_P\_S\_S\_N\_L\_L\_P\_S\_E\_E\_E\_

MT240511|Loja|2017|B

GAGACAATGGCCAGCTTCAACTTCAAACCAAGTTCAAACCTTGCTACCTAGCGAGGAAGAG

\_E\_T\_M\_A\_S\_F\_N\_F\_K\_P\_S\_S\_N\_L\_L\_P\_S\_E\_E\_E\_

MT240512|Azuay|2016|

GAGACAATGGCCGATTCAATTTCAAACCGAGCTCAAACCTTGCTGCCTAGTGAGGACGAG

\_E\_T\_M\_A\_G\_F\_N\_F\_K\_P\_S\_S\_N\_L\_L\_P\_S\_E\_D\_E\_

MT240513|Azuay|2016|

GAGACAATGGCCAGATTCAACTTCAAACCGAGCTCTAACTTGCTGCCCAGCGAGGACGAG

\_E\_T\_M\_A\_R\_F\_N\_F\_K\_P\_S\_S\_N\_L\_L\_P\_S\_E\_D\_E\_

MT240514|Azuay|2016|

GAGACAATGGCCAGCTTCAACTTCAAACCGAGCTCTAACTTGCTGCCCAGCGAGGACGAG  
\_E\_T\_M\_A\_S\_F\_N\_F\_K\_P\_S\_S\_N\_L\_L\_P\_S\_E\_D\_E\_

MZ490607|Tungurahua|

GAGACGATGGCCAGCTTCAACTTCAAACCAAGTTCAAACCTTGCTACCTAGCGAGGAAGAG  
\_E\_T\_M\_A\_S\_F\_N\_F\_K\_P\_S\_S\_N\_L\_L\_P\_S\_E\_E\_E\_

MZ490608|Tungurahua|

GAGACGATGGCCAGCTTCAACTTCAAACCAAGTTCAAACCTTGCTACCTAGCGAGGAAGAG  
\_E\_T\_M\_A\_S\_F\_N\_F\_K\_P\_S\_S\_N\_L\_L\_P\_S\_E\_E\_E\_

MZ490609|Tungurahua|

GAGACAATGGCCAGCTTCAACTTCAAACCAAGTTCAAACCTTGCTACCTAGCGAGGAAGAG  
\_E\_T\_M\_A\_S\_F\_N\_F\_K\_P\_S\_S\_N\_L\_L\_P\_S\_E\_E\_E\_

MZ490610|Tungurahua|

GAGACAATGGCCAGTTTCAACTTCAAACCAAGTTCAAACCTTGCTACCTAGCGAGGAAGAG  
\_E\_T\_M\_A\_S\_F\_N\_F\_K\_P\_S\_S\_N\_L\_L\_P\_S\_E\_E\_E\_

MZ490611|Tungurahua|

GAGACAATGGCCAGTTTCAACTTCAAACCAAGTTCAAACCTTGCTACCTAGCGAGGAAGAG  
\_E\_T\_M\_A\_S\_F\_N\_F\_K\_P\_S\_S\_N\_L\_L\_P\_S\_E\_E\_E\_

MZ490612|Tungurahua|

GAGACAATGGCCAGCTTCAATTTCAAACCAAGCTCAAACCTTGCTGCCTAGCGAGGACGAG  
\_E\_T\_M\_A\_S\_F\_N\_F\_K\_P\_S\_S\_N\_L\_L\_P\_S\_E\_D\_E\_

OL771197|Pichincha|2

GAGACAATGGCCAGCTTCAACTTCAAACCAAGTTCAAACCTTGCTACCTAGCGAGGAAGAG  
\_E\_T\_M\_A\_S\_F\_N\_F\_K\_P\_S\_S\_N\_L\_L\_P\_S\_E\_E\_E\_

OL771198|Pichincha|2

GAGACAATGGCCAGCTTCAACTTCAAACCAAGTTCAAACCTTGCTACCTAGCGAGGAAGAG  
\_E\_T\_M\_A\_S\_F\_N\_F\_K\_P\_S\_S\_N\_L\_L\_P\_S\_E\_E\_E\_

OL771199|Pichincha|2

GAGACAATGGCCAGCTTTAACTTCAAACCAAGTTCAAACCTTGCTACCCAGCGAGGAAGAG  
\_E\_T\_M\_A\_S\_F\_N\_F\_K\_P\_S\_S\_N\_L\_L\_P\_S\_E\_E\_E\_

OL771200|Pichincha|2

GAGACAATGGCCAGCTTCAATTTCAAACCAAGTTCAAATCTGCTGCCTAGCGAGGATGAG  
\_E\_T\_M\_A\_S\_F\_N\_F\_K\_P\_S\_S\_N\_L\_L\_P\_S\_E\_D\_E\_

| | | | |

MF978248|Pichincha|2

CTCAAGATCATATCCACATTACTGGTGGCAGCTAAAATACCCAACGCAAGCACCACCATT 180  
\_L\_K\_I\_I\_S\_T\_L\_L\_V\_A\_A\_K\_I\_P\_N\_A\_S\_T\_T\_I\_

MT240490|Imbabura|20

CTCAAGATCATATCCACATTAATGGTGGCTGCTAAAATACCGAGCGCGAGCACCACCATT  
\_L\_K\_I\_I\_S\_T\_L\_M\_V\_A\_A\_K\_I\_P\_S\_A\_S\_T\_T\_I\_

MT240491|Imbabura|20

CTCAAGATTATATCCACATTACTGATGGCAGCTAAAATACCGAGCGCGAGCACCACCATT  
\_L\_K\_I\_I\_S\_T\_L\_L\_M\_A\_A\_K\_I\_P\_S\_A\_S\_T\_T\_I\_

MT240492|Imbabura|20

CTCAAAATCATATCCACATTACTGATGGCAGCTAAAATACCAAGCGCGAGCACCACCATT  
\_L\_K\_I\_I\_S\_T\_L\_L\_M\_A\_A\_K\_I\_P\_S\_A\_S\_T\_T\_I\_

MT240493|Imbabura|20

CTCAAGATCATATCCACATTACTGGTGGCAGCTAAAATACCAAGCGCGAGCACCACCATT  
\_L\_K\_I\_I\_S\_T\_L\_L\_V\_A\_A\_K\_I\_P\_S\_A\_S\_T\_T\_I\_

MT240494|Pichincha|2

CTCAAGATCATATCCACATTACTAGTTGCAGCTAAAATACCAAGCGCGAGTACCACCATT  
\_L\_K\_I\_I\_S\_T\_L\_L\_V\_A\_A\_K\_I\_P\_S\_A\_S\_T\_T\_I\_

MT240495|Pichincha|2

CTCAAGACCATATCCGCACTACTGGTGGCTGCCAAAATACCAAGTGCAAGCACCACGATT  
\_L\_K\_T\_I\_S\_A\_L\_L\_V\_A\_A\_K\_I\_P\_S\_A\_S\_T\_T\_I\_

MT240496|Tungurahua|

CTCAAGGTTATATCCACATTACTGGTGGCAGCTAAAATACCAAGCGCGAGCACCACCATT  
\_L\_K\_V\_I\_S\_T\_L\_L\_V\_A\_A\_K\_I\_P\_S\_A\_S\_T\_T\_I\_

MT240497|Tungurahua|

CTCAAAACCATATCCACATTACTGGTGGCAGCTAAAATACCGAGCGCAAGCACCACCATT  
\_L\_K\_T\_I\_S\_T\_L\_L\_V\_A\_A\_K\_I\_P\_S\_A\_S\_T\_T\_I\_

MT240498|Tungurahua|

CTCAAGATCATATCCTCACTACTGGTGGCAGCCAAAGTACCAAGCGTGAGTACCACCATT  
\_L\_K\_I\_I\_S\_S\_L\_L\_V\_A\_A\_K\_V\_P\_S\_V\_S\_T\_T\_I\_

MT240499|Tungurahua|

CTCAAGATCATATCCTCACTACTGGTGGCAGCCAAAGTACCAAGCGTGAGTACCACCATT  
\_L\_K\_I\_I\_S\_S\_L\_L\_V\_A\_A\_K\_V\_P\_S\_V\_S\_T\_T\_I\_

MT240500|Tungurahua|

CTCAAGATCATATCCACATTACTGGTGGCAGCCAAAATACCAAGCGCGAGCACCACCATT  
\_L\_K\_I\_I\_S\_T\_L\_L\_V\_A\_A\_K\_I\_P\_S\_A\_S\_T\_T\_I\_

MT240501|Tungurahua|

CTCAAGATCATATCCACATTACTGGTAGCAGCTAAAATACCAAGCGCAAGCACCACCATT  
\_L\_K\_I\_I\_S\_T\_L\_L\_V\_A\_A\_K\_I\_P\_S\_A\_S\_T\_T\_I\_

MT240502|Tungurahua|

CTTAAGGTTATATCCACATTAATGGTGGCAGCTAAGATACCGAGTGCGAGCACTACCATA

\_L\_K\_V\_I\_S\_T\_L\_M\_V\_A\_A\_K\_I\_P\_S\_A\_S\_T\_T\_I\_

MT240503|Tungurahua|

CTCAAGATCATATCCACATTACTGGTGGCAGCTAAAATACCAAGCGCAAGCACCACCATT

\_L\_K\_I\_I\_S\_T\_L\_L\_V\_A\_A\_K\_I\_P\_S\_A\_S\_T\_T\_I\_

MT240504|Tungurahua|

CTTAAGGTTATATCCACATTAATGGTGGCAGCTAAAATACCGAGTGCGAGCACTACCATA

\_L\_K\_V\_I\_S\_T\_L\_M\_V\_A\_A\_K\_I\_P\_S\_A\_S\_T\_T\_I\_

MT240505|Azuay|2017|

CTCAAGACCATATCCACATTACTGGTGGCAGCAAAAATACCGAGTGGGAGCACCACCATT

\_L\_K\_T\_I\_S\_T\_L\_L\_V\_A\_A\_K\_I\_P\_S\_G\_S\_T\_T\_I\_

MT240506|Azuay|2017|

CTCAAGACCATATCCACATTACTGGTGGCAGCAAAAATACCGAGTGGGAGCACCACCATT

\_L\_K\_T\_I\_S\_T\_L\_L\_V\_A\_A\_K\_I\_P\_S\_G\_S\_T\_T\_I\_

MT240507|Loja|2017|B

CTCAAGACCATATCCACATTACTGGTGGCAGCAAAAATACCGAGTGGGAGCACCACCATT

\_L\_K\_T\_I\_S\_T\_L\_L\_V\_A\_A\_K\_I\_P\_S\_G\_S\_T\_T\_I\_

MT240508|Loja|2017|B

CTCAAGACCATATCCACATTACTGGTGGCAGCAAAAATACCGAGTGGGAGCACCACCATT

\_L\_K\_T\_I\_S\_T\_L\_L\_V\_A\_A\_K\_I\_P\_S\_G\_S\_T\_T\_I\_

MT240509|Loja|2017|B

CTCAAGACCATATCCACATTACTGGTGGCAGCAAAAATACCGAGTGGGAGCACCACCATT

\_L\_K\_T\_I\_S\_T\_L\_L\_V\_A\_A\_K\_I\_P\_S\_G\_S\_T\_T\_I\_

MT240510|Loja|2017|B

CTCAAGACCATATCCACATTACTGGTGGCAGCAAAAATACCGAGTGGGAGCACCACCATT

\_L\_K\_T\_I\_S\_T\_L\_L\_V\_A\_A\_K\_I\_P\_S\_G\_S\_T\_T\_I\_

MT240511|Loja|2017|B

CTCAAGACCATATCCACATTACTGGTGGCAGCAAAAATACCGAGTGGGAGCACCACCATT

\_L\_K\_T\_I\_S\_T\_L\_L\_V\_A\_A\_K\_I\_P\_S\_G\_S\_T\_T\_I\_

MT240512|Azuay|2016|

CTTAAGACCATATCCACACTACTGGTGGCAGCTAAGATACCGAGTACAAGCACCACCATT

\_L\_K\_T\_I\_S\_T\_L\_L\_V\_A\_A\_K\_I\_P\_S\_T\_S\_T\_T\_I\_

MT240513|Azuay|2016|

CTTAAGACCATATCCACATTACTGGTGGCGGCCAAAATACCGAGTGCAAGTACCACCATT

\_L\_K\_T\_I\_S\_T\_L\_L\_V\_A\_A\_K\_I\_P\_S\_A\_S\_T\_T\_I\_

MT240514|Azuay|2016|

CTTAAGACCATATCCACATTACTGGTGGCGGCCAAAATACCGAGTGCAAGTACCACCATT

\_L\_K\_T\_I\_S\_T\_L\_L\_V\_A\_A\_K\_I\_P\_S\_A\_S\_T\_T\_I\_



MZ490607|Tungurahua|

CTCAAGGTTATATCCACATTACTGGTGGCAGCTAAAATACCAAGCGCGAGCACCACCATT  
\_L\_K\_V\_I\_S\_T\_L\_L\_V\_A\_A\_K\_I\_P\_S\_A\_S\_T\_T\_I\_

MZ490608|Tungurahua|

CTCAAGGTTATATCCACATTACTGGTGGCAGCTAAAATACCAAGCGCGAGCACCACCATT  
\_L\_K\_V\_I\_S\_T\_L\_L\_V\_A\_A\_K\_I\_P\_S\_A\_S\_T\_T\_I\_

MZ490609|Tungurahua|

CTCAAGACCATATCCACATTATTGGTGGCAGCTAAAATACCGAGCGTGAGCACCACCATT  
\_L\_K\_T\_I\_S\_T\_L\_L\_V\_A\_A\_K\_I\_P\_S\_V\_S\_T\_T\_I\_

MZ490610|Tungurahua|

CTCAAAACCATATCCACATTACTGGTAGCAGCTAAAATACCAAGCGCGAGCACCACCATT  
\_L\_K\_T\_I\_S\_T\_L\_L\_V\_A\_A\_K\_I\_P\_S\_A\_S\_T\_T\_I\_

MZ490611|Tungurahua|

CTCAAAACCATATCCACATTACTGGTAGCAGCTAAAATACCAAGCGCGAGCACCACCATT  
\_L\_K\_T\_I\_S\_T\_L\_L\_V\_A\_A\_K\_I\_P\_S\_A\_S\_T\_T\_I\_

MZ490612|Tungurahua|

CTTAGGACCATATCCACATTACTGGTGGCAGCTAAAGTACCGAGTGCAAGTACCACCATT  
\_L\_R\_T\_I\_S\_T\_L\_L\_V\_A\_A\_K\_V\_P\_S\_A\_S\_T\_T\_I\_

OL771197|Pichincha|2

CTCAAGACCATATCCACATTACTGGTGGCAGCAAAAATACCGAGTGCGAGCACCACCATT  
\_L\_K\_T\_I\_S\_T\_L\_L\_V\_A\_A\_K\_I\_P\_S\_A\_S\_T\_T\_I\_

OL771198|Pichincha|2

CTCAAGACCATATCCACATTACTGGTGGCAGCAAAAATACCGAGTGTGAGCACCACCATT  
\_L\_K\_T\_I\_S\_T\_L\_L\_V\_A\_A\_K\_I\_P\_S\_V\_S\_T\_T\_I\_

OL771199|Pichincha|2

CTCAAGACCATATCCACATTACTGGTGGCAGCAAAAATACCGAGCATGAGCACCACCATT  
\_L\_K\_T\_I\_S\_T\_L\_L\_V\_A\_A\_K\_I\_P\_S\_M\_S\_T\_T\_I\_

OL771200|Pichincha|2

CTCAAGACCATATCCGCACTACTGGTGGCTGCTAAAATACCAAGTACAAGCACCACCATT  
\_L\_K\_T\_I\_S\_A\_L\_L\_V\_A\_A\_K\_I\_P\_S\_T\_S\_T\_T\_I\_

| | | | |

MF978248|Pichincha|2

GTTGCAATGGACTTGGTCAACTTCTGTTATGACAATGGGTCTAGTGTGTACACGGTGATT 240  
\_V\_A\_M\_D\_L\_V\_N\_F\_C\_Y\_D\_N\_G\_S\_S\_V\_Y\_T\_V\_I\_

MT240490|Imbabura|20

GTTGCAATGGACTTGGTCAACTTCTGCTATGACAATGGGTCCAGTGCGTACACGGTGATT  
\_V\_A\_M\_D\_L\_V\_N\_F\_C\_Y\_D\_N\_G\_S\_S\_A\_Y\_T\_V\_I\_

MT240491|Imbabura|20

GTTGCAATGGACTTGGTCAACTTCTGCTATGACAATGGGTCCAGTGCGTACACGGTGATT  
\_V\_A\_M\_D\_L\_V\_N\_F\_C\_Y\_D\_N\_G\_S\_S\_A\_Y\_T\_V\_I\_

MT240492|Imbabura|20

GTTGCAATGGACTTGGTCAACTTCTGCTATGACAATGGGTCCAGTGCGTACACGGTGATT  
\_V\_A\_M\_D\_L\_V\_N\_F\_C\_Y\_D\_N\_G\_S\_S\_A\_Y\_T\_V\_I\_

MT240493|Imbabura|20

GTTGCAATGGACTTGGTCAACTTCTGCTATGACAATGGGTCCAGTGCGTACACGGTGATT  
\_V\_A\_M\_D\_L\_V\_N\_F\_C\_Y\_D\_N\_G\_S\_S\_A\_Y\_T\_V\_I\_

MT240494|Pichincha|2

GCTGCAATGGACTTGGTTAACTTCTGCTATGACAATGGGTCCAGTGTGTACACGGTGATT  
\_A\_A\_M\_D\_L\_V\_N\_F\_C\_Y\_D\_N\_G\_S\_S\_V\_Y\_T\_V\_I\_

MT240495|Pichincha|2

GCTGCCATGGACTTGGTCAACTTTTGCTATGATAATGGATCAAGTGTGTACACAGCAATC  
\_A\_A\_M\_D\_L\_V\_N\_F\_C\_Y\_D\_N\_G\_S\_S\_V\_Y\_T\_A\_I\_

MT240496|Tungurahua|

GCTGCAATGGACTTGGTCAACTTCTGCTATGACAATGGGTCCAGTGTGTACACGGTGATT  
\_A\_A\_M\_D\_L\_V\_N\_F\_C\_Y\_D\_N\_G\_S\_S\_V\_Y\_T\_V\_I\_

MT240497|Tungurahua|

GTTGCAATGGACTTGGTCAACTTCTGCTATGACAATGGGTCCAGTGTGTACACGGTGATT  
\_V\_A\_M\_D\_L\_V\_N\_F\_C\_Y\_D\_N\_G\_S\_S\_V\_Y\_T\_V\_I\_

MT240498|Tungurahua|

GCTGCAATGGACTTGGTCAACTTCTGCTATGACAATGGGTCCAGTGTGTATACGGTGATT  
\_A\_A\_M\_D\_L\_V\_N\_F\_C\_Y\_D\_N\_G\_S\_S\_V\_Y\_T\_V\_I\_

MT240499|Tungurahua|

GCTGCAATGGACTTGGTCAACTTCTGCTATGACAATGGGTCCAGTGTGTATACGGTGATT  
\_A\_A\_M\_D\_L\_V\_N\_F\_C\_Y\_D\_N\_G\_S\_S\_V\_Y\_T\_V\_I\_

MT240500|Tungurahua|

GCTGCAATGGACTTGGTCAACTTCTGCTATGACAATGGGTCCAGTGTGTACACGGTGATT  
\_A\_A\_M\_D\_L\_V\_N\_F\_C\_Y\_D\_N\_G\_S\_S\_V\_Y\_T\_V\_I\_

MT240501|Tungurahua|

GCTGCAATGGACTTGGTCAACTTCTGCTATGACAATGGGTCCAGTGTGTACACGGTGATT  
\_A\_A\_M\_D\_L\_V\_N\_F\_C\_Y\_D\_N\_G\_S\_S\_V\_Y\_T\_V\_I\_

MT240502|Tungurahua|

GTTGCAATGGATTTGGTTAACTTCTGCTATGACAATGGATCCAGCGTGTACACAACAGTT  
\_V\_A\_M\_D\_L\_V\_N\_F\_C\_Y\_D\_N\_G\_S\_S\_V\_Y\_T\_T\_V\_

MT240503|Tungurahua|

GCTGCAATGGACTTGGTCAACTTCTGCTATGACAATGGGTCCAGTGTGTACACGGTGATT

\_A\_A\_M\_D\_L\_V\_N\_F\_C\_Y\_D\_N\_G\_S\_S\_V\_Y\_T\_V\_I\_  
MT240504|Tungurahua|  
GTTGCAATGGATTGGTTAACTTCTGCTATGACAATGGATCCAGCGTGTACACAACAATT  
\_V\_A\_M\_D\_L\_V\_N\_F\_C\_Y\_D\_N\_G\_S\_S\_V\_Y\_T\_T\_I\_  
MT240505|Azuay|2017|  
GTTGCAATGGACTTGGTTAACTTCTGCTATGACAATGGGTCCAGTGTGTATACGGCGATC  
\_V\_A\_M\_D\_L\_V\_N\_F\_C\_Y\_D\_N\_G\_S\_S\_V\_Y\_T\_A\_I\_  
MT240506|Azuay|2017|  
GTTGCAATGGACTTGGTTAACTTCTGCTATGACAATGGGTCCAGTGTGTATACGGCGATC  
\_V\_A\_M\_D\_L\_V\_N\_F\_C\_Y\_D\_N\_G\_S\_S\_V\_Y\_T\_A\_I\_  
MT240507|Loja|2017|B  
GTTGCAATGGACTTGGTTAACTTCTGCTATGACAATGGGTCCAGTGTGTATACGGCGATC  
\_V\_A\_M\_D\_L\_V\_N\_F\_C\_Y\_D\_N\_G\_S\_S\_V\_Y\_T\_A\_I\_  
MT240508|Loja|2017|B  
GTTGCAATGGACTTGGTCAACTTCTGCTATGACAATGGGTCCAGTGTGTACACGGTGATT  
\_V\_A\_M\_D\_L\_V\_N\_F\_C\_Y\_D\_N\_G\_S\_S\_V\_Y\_T\_V\_I\_  
MT240509|Loja|2017|B  
GTTGCAATGGACTTGGTTAACTTCTGCTATGACAATGGGTCCAGTGTGTATACGGCGATC  
\_V\_A\_M\_D\_L\_V\_N\_F\_C\_Y\_D\_N\_G\_S\_S\_V\_Y\_T\_A\_I\_  
MT240510|Loja|2017|B  
GTTGCAATGGACTTGGTCAACTTCTGCTATGACAATGGGTCCAGTGTGTACACGGTGATT  
\_V\_A\_M\_D\_L\_V\_N\_F\_C\_Y\_D\_N\_G\_S\_S\_V\_Y\_T\_V\_I\_  
MT240511|Loja|2017|B  
GTTGCAATGGACTTGGTTAACTTCTGCTATGACAATGGGTCCAGTGTGTATACGGCGATC  
\_V\_A\_M\_D\_L\_V\_N\_F\_C\_Y\_D\_N\_G\_S\_S\_V\_Y\_T\_A\_I\_  
MT240512|Azuay|2016|  
GCCGCAATGGATTGGTCAACTTCTGCTATGACAACGGATCCAGTGTGTACACGGTAGTT  
\_A\_A\_M\_D\_L\_V\_N\_F\_C\_Y\_D\_N\_G\_S\_S\_V\_Y\_T\_V\_V\_  
MT240513|Azuay|2016|  
GCTGCAATGGACTTGGTCAACTTCTGCTATGACAATGGGTCCAGTGTGTACACGGTAATT  
\_A\_A\_M\_D\_L\_V\_N\_F\_C\_Y\_D\_N\_G\_S\_S\_V\_Y\_T\_V\_I\_  
MT240514|Azuay|2016|  
GCTGCAATGGACTTGGTCAACTTCTGCTATGACAATGGGTCCAGTGTGTACACGGTAATT  
\_A\_A\_M\_D\_L\_V\_N\_F\_C\_Y\_D\_N\_G\_S\_S\_V\_Y\_T\_V\_I\_  
MZ490607|Tungurahua|  
GCTGCCATGGACTTGGTCAACTTCTGCTATGACAATGGGTCCAGTGTGTACACGGTGATT  
\_A\_A\_M\_D\_L\_V\_N\_F\_C\_Y\_D\_N\_G\_S\_S\_V\_Y\_T\_V\_I\_

MZ490608|Tungurahua|

GCTGCCATGGACTTGGTCAACTTCTGCTATGACAATGGGTCCAGTGTGTACACGGTGATT  
\_A\_A\_M\_D\_L\_V\_N\_F\_C\_Y\_D\_N\_G\_S\_S\_V\_Y\_T\_V\_I\_

MZ490609|Tungurahua|

GTAGCAATGGACTTGGTCAACTTCTGCTATGACAATGGGTCCAGTGCGTACACGGTGATT  
\_V\_A\_M\_D\_L\_V\_N\_F\_C\_Y\_D\_N\_G\_S\_S\_A\_Y\_T\_V\_I\_

MZ490610|Tungurahua|

GCTGCAATGGACTTGGTCAACTTCTGCTATGACAACGGGTCCAGTGTGTACACGGTGATC  
\_A\_A\_M\_D\_L\_V\_N\_F\_C\_Y\_D\_N\_G\_S\_S\_V\_Y\_T\_V\_I\_

MZ490611|Tungurahua|

GCTGCAATGGACTTGGTCAACTTCTGCTATGACAACGGGTCCAGTGTGTACACGGTGATC  
\_A\_A\_M\_D\_L\_V\_N\_F\_C\_Y\_D\_N\_G\_S\_S\_V\_Y\_T\_V\_I\_

MZ490612|Tungurahua|

GCTGCAATGGACTTGGTCAACTTCTGCTATGACAATGGATCCAGTGTGTACACAGCAATT  
\_A\_A\_M\_D\_L\_V\_N\_F\_C\_Y\_D\_N\_G\_S\_S\_V\_Y\_T\_A\_I\_

OL771197|Pichincha|2

GTTGCAATGGACTTGGTCAACTTCTGCTATGACAATGGGTCCAGTGTGTACACGGTGATT  
\_V\_A\_M\_D\_L\_V\_N\_F\_C\_Y\_D\_N\_G\_S\_S\_V\_Y\_T\_V\_I\_

OL771198|Pichincha|2

GTTGCAATGGACTTGGTCAACTTCTGCTATGACAATGGGTCCAGTGTGTACACGGTGATT  
\_V\_A\_M\_D\_L\_V\_N\_F\_C\_Y\_D\_N\_G\_S\_S\_V\_Y\_T\_V\_I\_

OL771199|Pichincha|2

GTGGCAATGGACTTGGTCAACTTCTGCTATGACAATGGGTCCAGTGCGTACACGGTGATT  
\_V\_A\_M\_D\_L\_V\_N\_F\_C\_Y\_D\_N\_G\_S\_S\_A\_Y\_T\_V\_I\_

OL771200|Pichincha|2

GCTGCTATGGATTGGTCAACTTTTGCTACGATAATGGATCAAGCGTTTACACAGCAATT  
\_A\_A\_M\_D\_L\_V\_N\_F\_C\_Y\_D\_N\_G\_S\_S\_V\_Y\_T\_A\_I\_

| | | | |

MF978248|Pichincha|2

TCTGGTGAATCCTCAATCACTGGCATCACTCTGGCCCAGATTGCAAGTATTGTCAAGGCT 300  
\_S\_G\_E\_S\_S\_I\_T\_G\_I\_T\_L\_A\_Q\_I\_A\_S\_I\_V\_K\_A\_

MT240490|Imbabura|20

TCTGGTGAATCCTCAGTCACTGGCGTCACTCTGGCCCAGATTGCAAGCATTGTCAAGGCT  
\_S\_G\_E\_S\_S\_V\_T\_G\_V\_T\_L\_A\_Q\_I\_A\_S\_I\_V\_K\_A\_

MT240491|Imbabura|20

TCTGGTGAATCCTCAGTCACTGGCGTCACTCTGGCCCAGATTGCAAGCATTGTCAAGGCT  
\_S\_G\_E\_S\_S\_V\_T\_G\_V\_T\_L\_A\_Q\_I\_A\_S\_I\_V\_K\_A\_

MT240492|Imbabura|20

TCTGGTGAATCCTCAGTCACTGGCGTCACTCTGGCCCAGATTGCAAGCATTGTCAAAGCT  
\_S\_G\_E\_S\_S\_V\_T\_G\_V\_T\_L\_A\_Q\_I\_A\_S\_I\_V\_K\_A\_

MT240493|Imbabura|20

TCTGGTGAATCCTCAGTCACTGGCGTCACTCTGGCCCAGATTGCAAGTATTGTCAAGGCT  
\_S\_G\_E\_S\_S\_V\_T\_G\_V\_T\_L\_A\_Q\_I\_A\_S\_I\_V\_K\_A\_

MT240494|Pichincha|2

TCTGGTGAATCATCAATTACTGGCATCACTCTGGCCCAGATTGCAAGCATTGTTAAGGCT  
\_S\_G\_E\_S\_S\_I\_T\_G\_I\_T\_L\_A\_Q\_I\_A\_S\_I\_V\_K\_A\_

MT240495|Pichincha|2

TCCGGTGAATCCTCAGTCGCTGGCGTCACTCTGGCCCAGATTGCAAGCATTGTCAAGGCC  
\_S\_G\_E\_S\_S\_V\_A\_G\_V\_T\_L\_A\_Q\_I\_A\_S\_I\_V\_K\_A\_

MT240496|Tungurahua|

TCTGGTGAATCCTCAGTCACTGGCATCACTCTGGCCCAGATTGCAAGCATTGTCAAGGCT  
\_S\_G\_E\_S\_S\_V\_T\_G\_I\_T\_L\_A\_Q\_I\_A\_S\_I\_V\_K\_A\_

MT240497|Tungurahua|

TCTGGTGAATCTTCAGTCACTGGCGTCACTCTGGCCCAGGTTGCAAGCATAGTCAAGGCT  
\_S\_G\_E\_S\_S\_V\_T\_G\_V\_T\_L\_A\_Q\_V\_A\_S\_I\_V\_K\_A\_

MT240498|Tungurahua|

TCTGGTGAATCCTCAGTCACTGGCATCACTCTGGCCCAGATTGCAAGCATTGTCAAGGCT  
\_S\_G\_E\_S\_S\_V\_T\_G\_I\_T\_L\_A\_Q\_I\_A\_S\_I\_V\_K\_A\_

MT240499|Tungurahua|

TCTGGTGAATCCTCAGTCCCTGGCATCACTCTGGCCCAGATTGCAAGCATTGTCAAGGCT  
\_S\_G\_E\_S\_S\_V\_P\_G\_I\_T\_L\_A\_Q\_I\_A\_S\_I\_V\_K\_A\_

MT240500|Tungurahua|

TCTGGTGAATCCTCAATCACTGGCATCACTTTGGCCCAGATTGCAAGCATTGTCAAAGCT  
\_S\_G\_E\_S\_S\_I\_T\_G\_I\_T\_L\_A\_Q\_I\_A\_S\_I\_V\_K\_A\_

MT240501|Tungurahua|

TCTGGTGAATCCTCAATCACTGGCATCACTCTGGCCCAGATTGCAAGCATTGTCAAGGCT  
\_S\_G\_E\_S\_S\_I\_T\_G\_I\_T\_L\_A\_Q\_I\_A\_S\_I\_V\_K\_A\_

MT240502|Tungurahua|

TCGGGTGAATCCTCAGTCCCAGGCGTCACTCTGGCCCAGATTGCAAGCATTGTTAAGGCT  
\_S\_G\_E\_S\_S\_V\_P\_G\_V\_T\_L\_A\_Q\_I\_A\_S\_I\_V\_K\_A\_

MT240503|Tungurahua|

TCTGGTGAATCCTCAATCACTGGCATCACTCTGGCCCAGATTGCAAGCATTGTCAAGGCT  
\_S\_G\_E\_S\_S\_I\_T\_G\_I\_T\_L\_A\_Q\_I\_A\_S\_I\_V\_K\_A\_

MT240504|Tungurahua|

TCGGGTGAATCCTCAGTCACAGGCGTCACTCTGGCCCAGATTGCAAGCATTGTTAAGGCT

\_S\_G\_E\_S\_S\_V\_T\_G\_V\_T\_L\_A\_Q\_I\_A\_S\_I\_V\_K\_A\_

MT240505|Azuay|2017|

TCTGGTGAATCCTCAATCGCTGGCGTCACTCTGGCCCAGATTGCAAGCATTGTCAAGGCC

\_S\_G\_E\_S\_S\_I\_A\_G\_V\_T\_L\_A\_Q\_I\_A\_S\_I\_V\_K\_A\_

MT240506|Azuay|2017|

TCTGGTGAATCCTCAATCGCTGGCGTCACTCTGGCCCAGATTGCAAGCATTGTCAAGGCC

\_S\_G\_E\_S\_S\_I\_A\_G\_V\_T\_L\_A\_Q\_I\_A\_S\_I\_V\_K\_A\_

MT240507|Loja|2017|B

TCTGGTGAATCCTCAATCGCTGGCGTCACTCTGGCCCAGATTGCAAGCATTGTCAAGGCC

\_S\_G\_E\_S\_S\_I\_A\_G\_V\_T\_L\_A\_Q\_I\_A\_S\_I\_V\_K\_A\_

MT240508|Loja|2017|B

TCTGGTGAATCCTCAATCGCTGGCGTCACTCTGGCCCAGATTGCAAGCATTGTCAAGGCC

\_S\_G\_E\_S\_S\_I\_A\_G\_V\_T\_L\_A\_Q\_I\_A\_S\_I\_V\_K\_A\_

MT240509|Loja|2017|B

TCTGGTGAATCCTCAATCGCTGGCGTCACTCTGGCCCAGATTGCAAGCATTGTCAAGGCC

\_S\_G\_E\_S\_S\_I\_A\_G\_V\_T\_L\_A\_Q\_I\_A\_S\_I\_V\_K\_A\_

MT240510|Loja|2017|B

TCTGGTGAATCCTCAATCGCTGGCGTCACTCTGGCCCAGATTGCAAGCATTGTCAAGGCC

\_S\_G\_E\_S\_S\_I\_A\_G\_V\_T\_L\_A\_Q\_I\_A\_S\_I\_V\_K\_A\_

MT240511|Loja|2017|B

TCTGGTGAATCCTCAATCGCTGGCGTCACTCTGGCCCAGATTGCAAGCATTGTCAAGGCC

\_S\_G\_E\_S\_S\_I\_A\_G\_V\_T\_L\_A\_Q\_I\_A\_S\_I\_V\_K\_A\_

MT240512|Azuay|2016|

TCCGGTGAATCCTCAGTTGCTGGCGTCACTTTGGCCCAAATTGCAAGCATTGTCAAGGCT

\_S\_G\_E\_S\_S\_V\_A\_G\_V\_T\_L\_A\_Q\_I\_A\_S\_I\_V\_K\_A\_

MT240513|Azuay|2016|

TCCGGAGAATCTTCAGTTACCGGCATCACCTGGCTCAGATTGCTAGCATTGTCAAGGCT

\_S\_G\_E\_S\_S\_V\_T\_G\_I\_T\_L\_A\_Q\_I\_A\_S\_I\_V\_K\_A\_

MT240514|Azuay|2016|

TCCGGAGAATCTTCAGTTACCGGCATCACCTGGCTCAGATTGCTAGCATTGTCAAGGCT

\_S\_G\_E\_S\_S\_V\_T\_G\_I\_T\_L\_A\_Q\_I\_A\_S\_I\_V\_K\_A\_

MZ490607|Tungurahua|

TCTGGTGAATCCTCAGTCACTGGCATCACTCTGGCCCAGATTGCAAGCATTGTCAAGGCT

\_S\_G\_E\_S\_S\_V\_T\_G\_I\_T\_L\_A\_Q\_I\_A\_S\_I\_V\_K\_A\_

MZ490608|Tungurahua|

TCTGGTGAATCCTCAGTCACTGGCATCACTCTGGCCCAGATTGCAAGCATTGTCAAGGCT

\_S\_G\_E\_S\_S\_V\_T\_G\_I\_T\_L\_A\_Q\_I\_A\_S\_I\_V\_K\_A\_

MZ490609|Tungurahua|

TCTGGCGAATCCTCAGTCACTGGCGTCACTCTGGCCCAGATTGCAAGCATTGTCAAGGCT  
\_S\_G\_E\_S\_S\_V\_T\_G\_V\_T\_L\_A\_Q\_I\_A\_S\_I\_V\_K\_A\_

MZ490610|Tungurahua|

TCTGGTGAATCCTCAATCACTGGCATCACTCTGGCCCAGATTGCAAGCATTGTCAAGGCT  
\_S\_G\_E\_S\_S\_I\_T\_G\_I\_T\_L\_A\_Q\_I\_A\_S\_I\_V\_K\_A\_

MZ490611|Tungurahua|

TCTGGTGAATCCTCAATCACTGGCATCACTCTGGCCCAGATTGCAAGCATTGTCAAGGCT  
\_S\_G\_E\_S\_S\_I\_T\_G\_I\_T\_L\_A\_Q\_I\_A\_S\_I\_V\_K\_A\_

MZ490612|Tungurahua|

TCTGGTGAATCCTCAGTCACTGGCGTTACTCTAGCCCAGATTGCAAGCATTGTCAAGGCT  
\_S\_G\_E\_S\_S\_V\_T\_G\_V\_T\_L\_A\_Q\_I\_A\_S\_I\_V\_K\_A\_

OL771197|Pichincha|2

TCTGGTGAATCCTCAATCGCTGGCGTCACTCTGGCCCAGATTGCAAGCATTGTCAAGGCC  
\_S\_G\_E\_S\_S\_I\_A\_G\_V\_T\_L\_A\_Q\_I\_A\_S\_I\_V\_K\_A\_

OL771198|Pichincha|2

TCTGGTGAATCCTCAATCGCTGGCGTCACTCTGGCCCAGATTGCAAGCATTGTCAAGGCC  
\_S\_G\_E\_S\_S\_I\_A\_G\_V\_T\_L\_A\_Q\_I\_A\_S\_I\_V\_K\_A\_

OL771199|Pichincha|2

TCTGGTGAATCCTCAGTCACTGGCGTCACTCTGGCCCAGATTGCAAGTATTGTCAAGGCT  
\_S\_G\_E\_S\_S\_V\_T\_G\_V\_T\_L\_A\_Q\_I\_A\_S\_I\_V\_K\_A\_

OL771200|Pichincha|2

TCTGGTGAAAGCTCAGTCGCTGGCGTTACCCTGGCCCAGATTGCAAGCATTGTCAAGGCC  
\_S\_G\_E\_S\_S\_V\_A\_G\_V\_T\_L\_A\_Q\_I\_A\_S\_I\_V\_K\_A\_

| | | | |

MF978248|Pichincha|2

TCCGGCACTTCACTACGAAAATTCTGCCGATTCTTTGCACCAGTAATTTGGAACCTGAGG 360  
\_S\_G\_T\_S\_L\_R\_K\_F\_C\_R\_F\_F\_A\_P\_V\_I\_W\_N\_L\_R\_

MT240490|Imbabura|20

TCCGGCACCTCACTACGAAAATTCTGCCGATTCTTTGCACCAGTAATTTGGAACCTGAGG  
\_S\_G\_T\_S\_L\_R\_K\_F\_C\_R\_F\_F\_A\_P\_V\_I\_W\_N\_L\_R\_

MT240491|Imbabura|20

TCCGGCACCTCACTACGAAAATTCTGCCGATTCTTTGCACCAGTAATTTGGAACCTGAGG  
\_S\_G\_T\_S\_L\_R\_K\_F\_C\_R\_F\_F\_A\_P\_V\_I\_W\_N\_L\_R\_

MT240492|Imbabura|20

TCCGGCACCTCACTACGAAAATTCTGCCGATTCTTTGCACCAGTAATTTGGAACCTGAGG  
\_S\_G\_T\_S\_L\_R\_K\_F\_C\_R\_F\_F\_A\_P\_V\_I\_W\_N\_L\_R\_

MT240493|Imbabura|20

TCCGGCACCTCACTACGAAAATTCTGCCGATTCTTTGCACCAGTAATTTGGAACCTGAGG  
\_S\_G\_T\_S\_L\_R\_K\_F\_C\_R\_F\_F\_A\_P\_V\_I\_W\_N\_L\_R\_

MT240494|Pichincha|2

TCCGGCACTTCACTACGAAAATTCTGCCGATTCTTTGCACCAGTAATTTGGAACCTGAGA  
\_S\_G\_T\_S\_L\_R\_K\_F\_C\_R\_F\_F\_A\_P\_V\_I\_W\_N\_L\_R\_

MT240495|Pichincha|2

TCCGGCACCTCACTGCGAAAATTCTGTGCGATTCTTTGCACCAGTGATTTGGAACCTGAGG  
\_S\_G\_T\_S\_L\_R\_K\_F\_C\_R\_F\_F\_A\_P\_V\_I\_W\_N\_L\_R\_

MT240496|Tungurahua|

TCCGGCACTTCACTGCGAAAATTCTGCCGATTCTTTGCACCAGTAATTTGGAACCTGAGG  
\_S\_G\_T\_S\_L\_R\_K\_F\_C\_R\_F\_F\_A\_P\_V\_I\_W\_N\_L\_R\_

MT240497|Tungurahua|

TCCGGAACCTCACTACGAAAATTCTGCCGATTCTTTGCACCAGTAATTTGGAACCTGAGG  
\_S\_G\_T\_S\_L\_R\_K\_F\_C\_R\_F\_F\_A\_P\_V\_I\_W\_N\_L\_R\_

MT240498|Tungurahua|

TCCGGCACTTCACTACGAAAATTCTGCCGATTCTTTGCACCAGTAATTTGGAACCTGAGG  
\_S\_G\_T\_S\_L\_R\_K\_F\_C\_R\_F\_F\_A\_P\_V\_I\_W\_N\_L\_R\_

MT240499|Tungurahua|

TCCGGCACTTCACTACGAAAATTCTGCCGATTCTTTGCACCAGTAATTTGGAACCTGAGG  
\_S\_G\_T\_S\_L\_R\_K\_F\_C\_R\_F\_F\_A\_P\_V\_I\_W\_N\_L\_R\_

MT240500|Tungurahua|

TCCGGCACTTCACTACGAAAATTCTGCCGATTCTTTGCACCAGTGATTTGGAACCTGAGG  
\_S\_G\_T\_S\_L\_R\_K\_F\_C\_R\_F\_F\_A\_P\_V\_I\_W\_N\_L\_R\_

MT240501|Tungurahua|

TCCGGCACTTCACTACGAAAATTCTGCCGATTCTTTGCACCAGTGATTTGGAACCTGAGG  
\_S\_G\_T\_S\_L\_R\_K\_F\_C\_R\_F\_F\_A\_P\_V\_I\_W\_N\_L\_R\_

MT240502|Tungurahua|

TCCGGCACCTCACTACGAAAATTTTGCCGATTCTTTGCACCAGTGATTTGGAATCTGAGA  
\_S\_G\_T\_S\_L\_R\_K\_F\_C\_R\_F\_F\_A\_P\_V\_I\_W\_N\_L\_R\_

MT240503|Tungurahua|

TCCGGCACTTCACTACGAAAATTCTGCCGATTCTTTGCACCAGTAATTTGGAACCTGAGG  
\_S\_G\_T\_S\_L\_R\_K\_F\_C\_R\_F\_F\_A\_P\_V\_I\_W\_N\_L\_R\_

MT240504|Tungurahua|

TCCGGCACCTCACTACGAAAATTTTGCCGATTCTTTGCACCAGTGATTTGGAATCTGAGA  
\_S\_G\_T\_S\_L\_R\_K\_F\_C\_R\_F\_F\_A\_P\_V\_I\_W\_N\_L\_R\_

MT240505|Azuay|2017|

TCCGGCACCTCACTACGAAAATTCTGCCGATTCTTTGCACCGGTAATTTGGAACCTGAGA



\_S\_G\_T\_S\_L\_R\_K\_F\_C\_R\_F\_F\_A\_P\_V\_I\_W\_N\_L\_R\_

MT240506|Azuay|2017|

TCCGGCACCTCACTACGAAAATTCTGCCGATTCTTTGCACCGGTAATTTGGAACCTGAGA

\_S\_G\_T\_S\_L\_R\_K\_F\_C\_R\_F\_F\_A\_P\_V\_I\_W\_N\_L\_R\_

MT240507|Loja|2017|B

TCCGGCACCTCACTACGAAAATTCTGCCGATTCTTTGCACCGGTAATTTGGAACCTGAGA

\_S\_G\_T\_S\_L\_R\_K\_F\_C\_R\_F\_F\_A\_P\_V\_I\_W\_N\_L\_R\_

MT240508|Loja|2017|B

TCTGGCACCTCACTACGAAAATTCTGCCGATTCTTTGCACCGGTAATTTGGAACCTGAGA

\_S\_G\_T\_S\_L\_R\_K\_F\_C\_R\_F\_F\_A\_P\_V\_I\_W\_N\_L\_R\_

MT240509|Loja|2017|B

TCCGGCACCTCACTACGAAAATTCTGCCGATTCTTTGCACCGGTAATTTGGAACCTGAGA

\_S\_G\_T\_S\_L\_R\_K\_F\_C\_R\_F\_F\_A\_P\_V\_I\_W\_N\_L\_R\_

MT240510|Loja|2017|B

TCTGGCACCTCACTACGAAAATTCTGCCGATTCTTTGCACCGGTAATTTGGAACCTGAGA

\_S\_G\_T\_S\_L\_R\_K\_F\_C\_R\_F\_F\_A\_P\_V\_I\_W\_N\_L\_R\_

MT240511|Loja|2017|B

TCCGGCACCTCACTACGAAAATTCTGCCGATTCTTTGCACCGGTAATTTGGAACCTGAGA

\_S\_G\_T\_S\_L\_R\_K\_F\_C\_R\_F\_F\_A\_P\_V\_I\_W\_N\_L\_R\_

MT240512|Azuay|2016|

TCCGGCACCTCACTGCGAAAATTCTGCCGATTCTTTGCACCAGTGATCTGGAACCTGAGG

\_S\_G\_T\_S\_L\_R\_K\_F\_C\_R\_F\_F\_A\_P\_V\_I\_W\_N\_L\_R\_

MT240513|Azuay|2016|

TCAGGCACCTCATTACGAAAATTCTGCCGATTCTTTGCACCAGTGATCTGGAACCTGAGG

\_S\_G\_T\_S\_L\_R\_K\_F\_C\_R\_F\_F\_A\_P\_V\_I\_W\_N\_L\_R\_

MT240514|Azuay|2016|

TCAGGCACCTCACTACGAAAATTCTGCCGATTCTTTGCACCAGTGATTTGGAACCTGAGG

\_S\_G\_T\_S\_L\_R\_K\_F\_C\_R\_F\_F\_A\_P\_V\_I\_W\_N\_L\_R\_

MZ490607|Tungurahua|

TCCGGCACTTCACTGCGAAAATTCTGCCGATTCTTTGCACCAGTAATTTGGAACCTGAGG

\_S\_G\_T\_S\_L\_R\_K\_F\_C\_R\_F\_F\_A\_P\_V\_I\_W\_N\_L\_R\_

MZ490608|Tungurahua|

TCCGGCACTTCACTGCGAAAATTCTGCCGATTCTTTGCACCAGTAATTTGGAACCTGAGG

\_S\_G\_T\_S\_L\_R\_K\_F\_C\_R\_F\_F\_A\_P\_V\_I\_W\_N\_L\_R\_

MZ490609|Tungurahua|

TCCGGCACCTCACTACGAAAATTCTGCCGATTCTTTGCACCAGTAATTTGGAACCTGAGA

\_S\_G\_T\_S\_L\_R\_K\_F\_C\_R\_F\_F\_A\_P\_V\_I\_W\_N\_L\_R\_

MZ490610|Tungurahua|

TCCGGCACTTCGCTACGAAAATTTTGCCGATTCTTTGCACCAGTAATTTGGAACCTGAGG  
\_S\_G\_T\_S\_L\_R\_K\_F\_C\_R\_F\_F\_A\_P\_V\_I\_W\_N\_L\_R\_

MZ490611|Tungurahua|

TCCGGCACTTCGCTACGAAAATTTTGCCGATTCTTTGCACCAGTAATTTGGAACCTGAGG  
\_S\_G\_T\_S\_L\_R\_K\_F\_C\_R\_F\_F\_A\_P\_V\_I\_W\_N\_L\_R\_

MZ490612|Tungurahua|

TCTGGCACCTCACTACGAAAATTCTGCCGATTCTTCGCACCAGTGATCTGGAACCTGAGG  
\_S\_G\_T\_S\_L\_R\_K\_F\_C\_R\_F\_F\_A\_P\_V\_I\_W\_N\_L\_R\_

OL771197|Pichincha|2

TCCGGCACCTCACTACGAAAATTCTGCCGATTCTTCGCACCGGTAATTTGGAACCTGAGA  
\_S\_G\_T\_S\_L\_R\_K\_F\_C\_R\_F\_F\_A\_P\_V\_I\_W\_N\_L\_R\_

OL771198|Pichincha|2

TCCGGCACCTCACTACGAAAATTCTGCCGATTCTTCGCACCGGTAATTTGGAACCTGAGA  
\_S\_G\_T\_S\_L\_R\_K\_F\_C\_R\_F\_F\_A\_P\_V\_I\_W\_N\_L\_R\_

OL771199|Pichincha|2

TCCGGCACCTCACTACGAAAATTCTGCCGATTCTTTGCACCAGTAATTTGGAACCTGAGG  
\_S\_G\_T\_S\_L\_R\_K\_F\_C\_R\_F\_F\_A\_P\_V\_I\_W\_N\_L\_R\_

OL771200|Pichincha|2

TCCGGCACTTCACTGCGAAAATTCTGTGATTCTTTGCACCAGTGATTTGGAACCTGAGG  
\_S\_G\_T\_S\_L\_R\_K\_F\_C\_R\_F\_F\_A\_P\_V\_I\_W\_N\_L\_R\_

| | | | |

MF978248|Pichincha|2

ACTGACAAAGTACCCCCGCAAACCTGGGAGAGCGCTGGGTACAAACCAACTGAGAAATTC 420  
\_T\_D\_K\_V\_P\_P\_A\_N\_W\_E\_S\_A\_G\_Y\_K\_P\_T\_E\_K\_F\_

MT240490|Imbabura|20

ACTGACAAAGTACCCCCGCAAACCTGGGAGAGTGCTGGGTTCAAACCAACTGAGAAATTC  
\_T\_D\_K\_V\_P\_P\_A\_N\_W\_E\_S\_A\_G\_F\_K\_P\_T\_E\_K\_F\_

MT240491|Imbabura|20

ACTGACAAAGTACCCCCGCAAACCTGGGAGAGTGCTGGGTTCAAACCAACTGAGAAATTC  
\_T\_D\_K\_V\_P\_P\_A\_N\_W\_E\_S\_A\_G\_F\_K\_P\_T\_E\_K\_F\_

MT240492|Imbabura|20

ACTGACAAAGTACCCCCGCAAACCTGGGAGAGTGCTGGGTTCAAACCAACTGAGAAATTC  
\_T\_D\_K\_V\_P\_P\_A\_N\_W\_E\_S\_A\_G\_F\_K\_P\_T\_E\_K\_F\_

MT240493|Imbabura|20

ACTGACAAAGTACCCCCGCAAACCTGGGAGAGTGCTGGGTTCAAACCAACTGAGAAATTC  
\_T\_D\_K\_V\_P\_P\_A\_N\_W\_E\_S\_A\_G\_F\_K\_P\_T\_E\_K\_F\_

MT240494|Pichincha|2

ACTGACAAAGTACCCCCCGCAAACCTGGGAGAGTGCTGGGTATAAACCAACTGAGAAATTC  
\_T\_D\_K\_V\_P\_P\_A\_N\_W\_E\_S\_A\_G\_Y\_K\_P\_T\_E\_K\_F\_

MT240495|Pichincha|2

ACTGATAAAGTGCCCCCGCAAACCTGGGAGAGTGCTGGGTACAAACCAACTGAAAAATTC  
\_T\_D\_K\_V\_P\_P\_A\_N\_W\_E\_S\_A\_G\_Y\_K\_P\_T\_E\_K\_F\_

MT240496|Tungurahua|

ACTGACAAAGTACCCCCCGCAAACCTGGGAGAGTGCTGGGTACAAACCAACTGAGAAATTC  
\_T\_D\_K\_V\_P\_P\_A\_N\_W\_E\_S\_A\_G\_Y\_K\_P\_T\_E\_K\_F\_

MT240497|Tungurahua|

ACTGACAAAGTACCCCCCGCAAACCTGGGAGAGTGCTGGGTTTAAACCAAATGAGAAATTC  
\_T\_D\_K\_V\_P\_P\_A\_N\_W\_E\_S\_A\_G\_F\_K\_P\_N\_E\_K\_F\_

MT240498|Tungurahua|

ACTGACAAAGTACCCCCCGCAAACCTGGGAGAGTGCTGGGTACAAACCAACTGAAAAATTC  
\_T\_D\_K\_V\_P\_P\_A\_N\_W\_E\_S\_A\_G\_Y\_K\_P\_T\_E\_K\_F\_

MT240499|Tungurahua|

ACTGACAAAGTACCCCCCGCAAACCTGGGAGAGTGCTGGGTACAAACCAACTGAAAAATTC  
\_T\_D\_K\_V\_P\_P\_A\_N\_W\_E\_S\_A\_G\_Y\_K\_P\_T\_E\_K\_F\_

MT240500|Tungurahua|

ACTGACAAAGTACCCCCCGCAAACCTGGGAGAGTGCTGGGTACAAACCAACTGAGAAATTC  
\_T\_D\_K\_V\_P\_P\_A\_N\_W\_E\_S\_A\_G\_Y\_K\_P\_T\_E\_K\_F\_

MT240501|Tungurahua|

ACTGACAAAGTACCCCCCGCAAACCTGGGAGAGTGCTGGGTATAAACCAACTGAGAAATTC  
\_T\_D\_K\_V\_P\_P\_A\_N\_W\_E\_S\_A\_G\_Y\_K\_P\_T\_E\_K\_F\_

MT240502|Tungurahua|

ACTGACAAAGTGCCCCCGCAAACCTGGGAAAGTGCTGGGTACAAACCAACTGAGAAATTC  
\_T\_D\_K\_V\_P\_P\_A\_N\_W\_E\_S\_A\_G\_Y\_K\_P\_T\_E\_K\_F\_

MT240503|Tungurahua|

ACTGACAAAGTACCCCCCGCAAACCTGGGAGAGTGCTGGGTACAAACCAACTGAGAAATTC  
\_T\_D\_K\_V\_P\_P\_A\_N\_W\_E\_S\_A\_G\_Y\_K\_P\_T\_E\_K\_F\_

MT240504|Tungurahua|

ACTGACAAAGTGCCCCCGCAAACCTGGGAAAGTGCTGGGTACAAACCAACTGAGAAATTC  
\_T\_D\_K\_V\_P\_P\_A\_N\_W\_E\_S\_A\_G\_Y\_K\_P\_T\_E\_K\_F\_

MT240505|Azuay|2017|

ACTGACAAAGTACCCCCCGCAAACCTGGGAGAGTGCTGGGTTTAAACCAACTGAGAAATTC  
\_T\_D\_K\_V\_P\_P\_A\_N\_W\_E\_S\_A\_G\_F\_K\_P\_T\_E\_K\_F\_

MT240506|Azuay|2017|

ACTGACAAAGTACCCCCCGCAAACCTGGGAGAGTGCTGGGTTTAAACCAACTGAGAAATTC

\_T\_D\_K\_V\_P\_P\_A\_N\_W\_E\_S\_A\_G\_F\_K\_P\_T\_E\_K\_F\_

MT240507|Loja|2017|B

ACTGACAAAGTACCCCCCGCAAACCTGGGAGAGTGCTGGGTTTAAACCAACTGAGAAATTC

\_T\_D\_K\_V\_P\_P\_A\_N\_W\_E\_S\_A\_G\_F\_K\_P\_T\_E\_K\_F\_

MT240508|Loja|2017|B

ACTGACAAAGTACCCCCCGCAAACCTGGGAGAGTGCTGGGTTTAAACCAACTGAGAAATTC

\_T\_D\_K\_V\_P\_P\_A\_N\_W\_E\_S\_A\_G\_F\_K\_P\_T\_E\_K\_F\_

MT240509|Loja|2017|B

ACTGACAAAGTACCCCCCGCAAACCTGGGAGAGTGCTGGGTTTAAACCAACTGAGAAATTC

\_T\_D\_K\_V\_P\_P\_A\_N\_W\_E\_S\_A\_G\_F\_K\_P\_T\_E\_K\_F\_

MT240510|Loja|2017|B

ACTGACAAAGTACCCCCCGCAAACCTGGGAGAGTGCTGGGTTTAAACCAACTGAGAAATTC

\_T\_D\_K\_V\_P\_P\_A\_N\_W\_E\_S\_A\_G\_F\_K\_P\_T\_E\_K\_F\_

MT240511|Loja|2017|B

ACTGACAAAGTACCCCCCGCAAACCTGGGAGAGTGCTGGGTTTAAACCAACTGAGAAATTC

\_T\_D\_K\_V\_P\_P\_A\_N\_W\_E\_S\_A\_G\_F\_K\_P\_T\_E\_K\_F\_

MT240512|Azuay|2016|

ACTGACAAAATACCCCCCGCGAACTGGGAGAGTGCTGGGTACAAACCAACTGAAAAATTC

\_T\_D\_K\_I\_P\_P\_A\_N\_W\_E\_S\_A\_G\_Y\_K\_P\_T\_E\_K\_F\_

MT240513|Azuay|2016|

ACTGACAAAGTGCCCCCGCCAACTGGGAGAGTGCTGGGTACAAACCAACCGAAAAATTC

\_T\_D\_K\_V\_P\_P\_A\_N\_W\_E\_S\_A\_G\_Y\_K\_P\_T\_E\_K\_F\_

MT240514|Azuay|2016|

ACTGACAAAGTGCCCCCGCCAACTGGGAGAGTGCTGGGTACAAACCAACCGAGAAATTC

\_T\_D\_K\_V\_P\_P\_A\_N\_W\_E\_S\_A\_G\_Y\_K\_P\_T\_E\_K\_F\_

MZ490607|Tungurahua|

ACTGACAAAGTACCCCCCGCAAACCTGGGAGAGTGCTGGGTACAAACCAACTGAGAAATTC

\_T\_D\_K\_V\_P\_P\_A\_N\_W\_E\_S\_A\_G\_Y\_K\_P\_T\_E\_K\_F\_

MZ490608|Tungurahua|

ACTGACAAAGTACCCCCCGCAAACCTGGGAGAGTGCTGGGTACAAACCGACTGAGAAATTC

\_T\_D\_K\_V\_P\_P\_A\_N\_W\_E\_S\_A\_G\_Y\_K\_P\_T\_E\_K\_F\_

MZ490609|Tungurahua|

ACTGACAAAGTACCCCCCGCAAACCTGGGAGAGTGCTGGGTTCAAACCAAGTGAGAAATTC

\_T\_D\_K\_V\_P\_P\_A\_N\_W\_E\_S\_A\_G\_F\_K\_P\_S\_E\_K\_F\_

MZ490610|Tungurahua|

ACTGACAAAGTACCCCCCGCAAACCTGGGAGAGTGCTGGGTACAAACCAACTGAGAAATTT

\_T\_D\_K\_V\_P\_P\_A\_N\_W\_E\_S\_A\_G\_Y\_K\_P\_T\_E\_K\_F\_

MZ490611|Tungurahua|

ACTGACAAAGTACCCCCCGCAAACCTGGGAGAGTGCTGGGTACAAACCAACTGAGAAATTT  
\_T\_D\_K\_V\_P\_P\_A\_N\_W\_E\_S\_A\_G\_Y\_K\_P\_T\_E\_K\_F\_

MZ490612|Tungurahua|

ACTGACAAAGTACCCCCCGCAAACCTGGGAGAGTGCTGGTTACAAACCAACTGAAAAGTTC  
\_T\_D\_K\_V\_P\_P\_A\_N\_W\_E\_S\_A\_G\_Y\_K\_P\_T\_E\_K\_F\_

OL771197|Pichincha|2

ACTGACAAAGTACCCCCCGCAAACCTGGGAGAGTGCTGGGTTTAAACCAACTGAGAAATTC  
\_T\_D\_K\_V\_P\_P\_A\_N\_W\_E\_S\_A\_G\_F\_K\_P\_T\_E\_K\_F\_

OL771198|Pichincha|2

ACTGACAAAGTACCCCCCGCAAACCTGGGAGAGTGCTGGGTTTAAACCAACTGAGAAATTC  
\_T\_D\_K\_V\_P\_P\_A\_N\_W\_E\_S\_A\_G\_F\_K\_P\_T\_E\_K\_F\_

OL771199|Pichincha|2

ACTGACAAAGTACCACCTGCAAACCTGGGAAAGTGCTGGGTTCAAACCAACTGAAAAATTC  
\_T\_D\_K\_V\_P\_P\_A\_N\_W\_E\_S\_A\_G\_F\_K\_P\_T\_E\_K\_F\_

OL771200|Pichincha|2

ACTGACAAAGTGCCCCCGCAAACCTGGGAGAGTGCTGGGTACAAACCAACTGAAAAATTC  
\_T\_D\_K\_V\_P\_P\_A\_N\_W\_E\_S\_A\_G\_Y\_K\_P\_T\_E\_K\_F\_

| | | | |

MF978248|Pichincha|2

GCCGCCTTTGACTTCTTTGACGGCGTTGAGAACCCAGCAGCCATGCAACCACCGGGAGGG 480  
\_A\_A\_F\_D\_F\_F\_D\_G\_V\_E\_N\_P\_A\_A\_M\_Q\_P\_P\_G\_G\_

MT240490|Imbabura|20

GCCGCCTTTGACTTCTTTGACGGCGTTGAAAACCCAGCGGCCATGCAACCACCGGGAGGG  
\_A\_A\_F\_D\_F\_F\_D\_G\_V\_E\_N\_P\_A\_A\_M\_Q\_P\_P\_G\_G\_

MT240491|Imbabura|20

GCCGCCTTTGACTTCTTTGACGGCGTTGAAAACCCAGCAGCCATGCAACCACCGGGAGGG  
\_A\_A\_F\_D\_F\_F\_D\_G\_V\_E\_N\_P\_A\_A\_M\_Q\_P\_P\_G\_G\_

MT240492|Imbabura|20

GCCGCCTTTGACTTCTTTGACGGCGTTGAAAACCCAGCAGCCATGCAACCACCGGGAGGG  
\_A\_A\_F\_D\_F\_F\_D\_G\_V\_E\_N\_P\_A\_A\_M\_Q\_P\_P\_G\_G\_

MT240493|Imbabura|20

GCCGCCTTTGACTTCTTTGACGGCGTCGAAAACCCAGCAGCCATGCAACCACCGGGAGGG  
\_A\_A\_F\_D\_F\_F\_D\_G\_V\_E\_N\_P\_A\_A\_M\_Q\_P\_P\_G\_G\_

MT240494|Pichincha|2

GCCGCCTTTGACTTCTTTGACGGCGTTGAGAACCCAGCAGCTATGCAACCACCGGGAGGG  
\_A\_A\_F\_D\_F\_F\_D\_G\_V\_E\_N\_P\_A\_A\_M\_Q\_P\_P\_G\_G\_

MT240495|Pichincha|2

GCCGCCTTTCGATTTTGTGACGGCGGTTGAAAACCCAGCAGCCATGCAACCACCGGGAGGG  
\_A\_A\_F\_D\_F\_F\_D\_G\_G\_E\_N\_P\_A\_A\_M\_Q\_P\_P\_G\_G\_

MT240496|Tungurahua|

GCCGCCTTTGACTTCTTTGACGGCGGTTGAAAACCCAGCTGCTATGCAACCACCGGGAGGG  
\_A\_A\_F\_D\_F\_F\_D\_G\_V\_E\_N\_P\_A\_A\_M\_Q\_P\_P\_G\_G\_

MT240497|Tungurahua|

GCCGCCTTTGACTTCTTTGACGGGTGTCGAGAACCCAGCAGCCATGCAACCACCGGGAGGG  
\_A\_A\_F\_D\_F\_F\_D\_G\_V\_E\_N\_P\_A\_A\_M\_Q\_P\_P\_G\_G\_

MT240498|Tungurahua|

GCCGCCTTTGACTTCTTTGACGGCGGTTGAGAACCCAGCAGCCATGCAACCACCGGGAGGG  
\_A\_A\_F\_D\_F\_F\_D\_G\_V\_E\_N\_P\_A\_A\_M\_Q\_P\_P\_G\_G\_

MT240499|Tungurahua|

GCCGCCTTTGACTTCTTTGACGGCGGTTGAGAACCCAGCAGCCATGCAACCACCGGGAGGG  
\_A\_A\_F\_D\_F\_F\_D\_G\_V\_E\_N\_P\_A\_A\_M\_Q\_P\_P\_G\_G\_

MT240500|Tungurahua|

GCCGCCTTTGACTTCTTTGACGGCGGTTGAAAACCCAGCAGCCATGCAACCACCGGGAGGG  
\_A\_A\_F\_D\_F\_F\_D\_G\_V\_E\_N\_P\_A\_A\_M\_Q\_P\_P\_G\_G\_

MT240501|Tungurahua|

GCCGCCTTTGACTTCTTTGACGGCGGTTGAGAACCCAGCAGCCATGCAACCACCGGGAGGG  
\_A\_A\_F\_D\_F\_F\_D\_G\_V\_E\_N\_P\_A\_A\_M\_Q\_P\_P\_G\_G\_

MT240502|Tungurahua|

GCCGCCTTTGACTTCTTTGACGGCGGTTGAAAACCCAGCAGCCATGCAACCACCGGGAGGA  
\_A\_A\_F\_D\_F\_F\_D\_G\_V\_E\_N\_P\_A\_A\_M\_Q\_P\_P\_G\_G\_

MT240503|Tungurahua|

GCCGCCTTTGACTTCTTTGACGGCGGTTGAGAACCCAGCAGCCATGCAACCACCGGGAGGG  
\_A\_A\_F\_D\_F\_F\_D\_G\_V\_E\_N\_P\_A\_A\_M\_Q\_P\_P\_G\_G\_

MT240504|Tungurahua|

GCCGCCTTTGACTTCTTTGACGGCGGTTGAAAACCCAGCAGCCATGCAACCACCGGGAGGA  
\_A\_A\_F\_D\_F\_F\_D\_G\_V\_E\_N\_P\_A\_A\_M\_Q\_P\_P\_G\_G\_

MT240505|Azuay|2017|

GCCGCCTTTGACTTCTTTGACGGCGGTTGAGAACCCAGCAGCCATGCAACCACCGGGAGGG  
\_A\_A\_F\_D\_F\_F\_D\_G\_V\_E\_N\_P\_A\_A\_M\_Q\_P\_P\_G\_G\_

MT240506|Azuay|2017|

GCCGCCTTTGACTTCTTTGACGGCGGTTGAGAACCCAGCAGCCATGCAACCACCGGGAGGG  
\_A\_A\_F\_D\_F\_F\_D\_G\_V\_E\_N\_P\_A\_A\_M\_Q\_P\_P\_G\_G\_

MT240507|Loja|2017|B

GCCGCCTTTGACTTCTTTGACGGCGGTTGAGAACCCAGCAGCCATGCAACCACCGGGAGGG

\_A\_A\_F\_D\_F\_F\_D\_G\_V\_E\_N\_P\_A\_A\_M\_Q\_P\_P\_G\_G\_  
MT240508|Loja|2017|B  
GCCGCCTTTGACTTCTTTGACGGCGTTGAGAACCCAGCAGCCATGCAACCACCGGGAGGG

\_A\_A\_F\_D\_F\_F\_D\_G\_V\_E\_N\_P\_A\_A\_M\_Q\_P\_P\_G\_G\_  
MT240509|Loja|2017|B  
GCCGCCTTTGACTTCTTTGACGGCGTTGAGAACCCAGCAGCCATGCAACCACCGGGAGGG

\_A\_A\_F\_D\_F\_F\_D\_G\_V\_E\_N\_P\_A\_A\_M\_Q\_P\_P\_G\_G\_  
MT240510|Loja|2017|B  
GCCGCCTTTGACTTCTTTGACGGCGTTGAGAACCCAGCAGCCATGCAACCACCGGGAGGG

\_A\_A\_F\_D\_F\_F\_D\_G\_V\_E\_N\_P\_A\_A\_M\_Q\_P\_P\_G\_G\_  
MT240511|Loja|2017|B  
GCCGCCTTTGACTTCTTTGACGGCGTTGAGAACCCAGCAGCCATGCAACCACCGGGAGGG

\_A\_A\_F\_D\_F\_F\_D\_G\_V\_E\_N\_P\_A\_A\_M\_Q\_P\_P\_G\_G\_  
MT240512|Azuay|2016|  
GCCGCCTTTGACTTCTTTGACGGCGTTGAAAACCCAGCAGCCATGCAACCACCGGGAGGG

\_A\_A\_F\_D\_F\_F\_D\_G\_V\_E\_N\_P\_A\_A\_M\_Q\_P\_P\_G\_G\_  
MT240513|Azuay|2016|  
GCCGCCTTTGATTTCTTCGACGGCGTTGAAAACCCAGCCGCCATGCAACCACCGGGAGGG

\_A\_A\_F\_D\_F\_F\_D\_G\_V\_E\_N\_P\_A\_A\_M\_Q\_P\_P\_G\_G\_  
MT240514|Azuay|2016|  
GCCGCCTTTGATTTCTTCGACGGCGTTGAAAACCCAGCCGCCATGCAACCACCGGGAGGG

\_A\_A\_F\_D\_F\_F\_D\_G\_V\_E\_N\_P\_A\_A\_M\_Q\_P\_P\_G\_G\_  
MZ490607|Tungurahua|  
GCCGCCTTTGACTTCTTTGACGGCGTTGAAAACCCAGCAGCTATGCAACCACCGGGAGGA

\_A\_A\_F\_D\_F\_F\_D\_G\_V\_E\_N\_P\_A\_A\_M\_Q\_P\_P\_G\_G\_  
MZ490608|Tungurahua|  
GCCGCCTTTGACTTCTTTGACGGCGTTGAAAACCCAGCGGCTATGCAACCACCGGGAGGA

\_A\_A\_F\_D\_F\_F\_D\_G\_V\_E\_N\_P\_A\_A\_M\_Q\_P\_P\_G\_G\_  
MZ490609|Tungurahua|  
GCCGCCTTTGACTTCTTTGACGGCGTTGAAAACCCAGCAGCCATGCAACCACCGGGAGGG

\_A\_A\_F\_D\_F\_F\_D\_G\_V\_E\_N\_P\_A\_A\_M\_Q\_P\_P\_G\_G\_  
MZ490610|Tungurahua|  
GCCGCCTTTGACTTCTTTGACGGTGTGAGAACCCAGCAGCCATGCGACCACCGGGAGGG

\_A\_A\_F\_D\_F\_F\_D\_G\_V\_E\_N\_P\_A\_A\_M\_R\_P\_P\_G\_G\_  
MZ490611|Tungurahua|  
GCCGCCTTTGACTTCTTTGACGGTGTGAGAACCCAGCAGCCATGCGACCACCGGGAGGG

\_A\_A\_F\_D\_F\_F\_D\_G\_V\_E\_N\_P\_A\_A\_M\_R\_P\_P\_G\_G\_

MZ490612|Tungurahua|

GCCGCCTTCGACTTCTTTGACGGCGTTGAAAACCCAGCAGCCATGCAACCACCGGGAGGG

\_A\_A\_F\_D\_F\_F\_D\_G\_V\_E\_N\_P\_A\_A\_M\_Q\_P\_P\_G\_G\_

OL771197|Pichincha|2

GCCGCCTTTGACTTCTTTGACGGCGTTGAGAACCCAGCAGCAATGCAACCACCGGGAGGG

\_A\_A\_F\_D\_F\_F\_D\_G\_V\_E\_N\_P\_A\_A\_M\_Q\_P\_P\_G\_G\_

OL771198|Pichincha|2

GCCGCCTTTGACTTCTTTGACGGCGTTGAGAACCCAGCAGCCATGCAACCACCGGGAGGG

\_A\_A\_F\_D\_F\_F\_D\_G\_V\_E\_N\_P\_A\_A\_M\_Q\_P\_P\_G\_G\_

OL771199|Pichincha|2

GCCGCCTTTGACTTCTTTGACGGCGTTGAAAATCCAGCAGCCATGCAACCACCGGGAGGG

\_A\_A\_F\_D\_F\_F\_D\_G\_V\_E\_N\_P\_A\_A\_M\_Q\_P\_P\_G\_G\_

OL771200|Pichincha|2

GCCGCCTTCGACTTCTTTGACGGCGTTGAAAACCCAGCAGCCATGCAACCACCGGGAGGA

\_A\_A\_F\_D\_F\_F\_D\_G\_V\_E\_N\_P\_A\_A\_M\_Q\_P\_P\_G\_G\_

| | | | |

MF978248|Pichincha|2

CTCATTAGGTCTCCAAATCAAGCGGAGAGGATAGCCAACCAAACCTAACAAACAGGTGAAC 540

\_L\_I\_R\_S\_P\_N\_Q\_A\_E\_R\_I\_A\_N\_Q\_T\_N\_K\_Q\_V\_N\_

MT240490|Imbabura|20

CTCATTAGGTCTCCAAATCAAGCGGAGAGGATAGCCAACCAAACCTAACAAACAGGTGAAC

\_L\_I\_R\_S\_P\_N\_Q\_A\_E\_R\_I\_A\_N\_Q\_T\_N\_K\_Q\_V\_N\_

MT240491|Imbabura|20

CTTATTAGGTCTCCAAACCAAGCGGAGAGGATAGCCAACCAAACCTAACAAACAGGTGAAC

\_L\_I\_R\_S\_P\_N\_Q\_A\_E\_R\_I\_A\_N\_Q\_T\_N\_K\_Q\_V\_N\_

MT240492|Imbabura|20

CTTATTAGGTCTCCAAACCAAGCGGAGAGGATAGCCAACCAAACCTAACAAACAGGTGAAC

\_L\_I\_R\_S\_P\_N\_Q\_A\_E\_R\_I\_A\_N\_Q\_T\_N\_K\_Q\_V\_N\_

MT240493|Imbabura|20

CTCATTAGGTCTCCAAACCAAGCGGAGAGGATAGCCAACCAAACCAACAAACAGGTGAAC

\_L\_I\_R\_S\_P\_N\_Q\_A\_E\_R\_I\_A\_N\_Q\_T\_N\_K\_Q\_V\_N\_

MT240494|Pichincha|2

CTCATTAGATCTCCAAATCAAGCGGAGAGGATAGCCAACCAAACCTAACAAACAGGTGAAC

\_L\_I\_R\_S\_P\_N\_Q\_A\_E\_R\_I\_A\_N\_Q\_T\_N\_K\_Q\_V\_N\_

MT240495|Pichincha|2

CTCATTCGGTCTCCAAACCAAGCTGAGAGGATAGCCAACCAAACCAATAAACAGGTGAAT

\_L\_I\_R\_S\_P\_N\_Q\_A\_E\_R\_I\_A\_N\_Q\_T\_N\_K\_Q\_V\_N\_



MT240496|Tungurahua|

CTCATTAGATCCCCAAATCAAGCGGAGAGGATAGCCAACCAAACCTAACAAACAGGTGAAC  
\_L\_I\_R\_S\_P\_N\_Q\_A\_E\_R\_I\_A\_N\_Q\_T\_N\_K\_Q\_V\_N\_

MT240497|Tungurahua|

CTCATTAGGTCTCCAAACCAAGCGGAGAGGATAGCCAACCAAACCTAACAAACAGGTGAGT  
\_L\_I\_R\_S\_P\_N\_Q\_A\_E\_R\_I\_A\_N\_Q\_T\_N\_K\_Q\_V\_S\_

MT240498|Tungurahua|

CTCATTAGGTCCCCAAATCAAGCGGAGAGGATAGCCAACCAAACCTAACAAACAGGTGAAC  
\_L\_I\_R\_S\_P\_N\_Q\_A\_E\_R\_I\_A\_N\_Q\_T\_N\_K\_Q\_V\_N\_

MT240499|Tungurahua|

CTCATTAGGTCTCCAAATCAAGCGGAGAGGATAGCCAACCAAACCTAACAAACAGGTGAAC  
\_L\_I\_R\_S\_P\_N\_Q\_A\_E\_R\_I\_A\_N\_Q\_T\_N\_K\_Q\_V\_N\_

MT240500|Tungurahua|

CTCACTAGGTCTCCAAATCAAGCGGAGAGGATAGCCAACCAAACCTAACAAACAGGTGAAC  
\_L\_T\_R\_S\_P\_N\_Q\_A\_E\_R\_I\_A\_N\_Q\_T\_N\_K\_Q\_V\_N\_

MT240501|Tungurahua|

CTCATTAGGTCTCCAAATCAAGCGGAGAGGATAGCCAACCAAACCTAACAAACAGGTGAAC  
\_L\_I\_R\_S\_P\_N\_Q\_A\_E\_R\_I\_A\_N\_Q\_T\_N\_K\_Q\_V\_N\_

MT240502|Tungurahua|

CTCATCCGGTCCCCAAATCAAGCGGAGAGAATAGCCAACCAGACTAACAAACAAGTGAAC  
\_L\_I\_R\_S\_P\_N\_Q\_A\_E\_R\_I\_A\_N\_Q\_T\_N\_K\_Q\_V\_N\_

MT240503|Tungurahua|

CTCATTAGGTCTCCAAATCAAGCGGAGAGGATAGCCAACCAAACCTAACAAACAGGTGAAC  
\_L\_I\_R\_S\_P\_N\_Q\_A\_E\_R\_I\_A\_N\_Q\_T\_N\_K\_Q\_V\_N\_

MT240504|Tungurahua|

CTCATCCGGTCCCCAAATCAAGCGGAGAGAATAGCCAACCAAACCTAACAAACAAGTGAAC  
\_L\_I\_R\_S\_P\_N\_Q\_A\_E\_R\_I\_A\_N\_Q\_T\_N\_K\_Q\_V\_N\_

MT240505|Azuay|2017|

CTCATTAGGTCTCCAAACCAAGCGGAGAGGATAGCCAACCAAACCTAACAAACAGGTGAAC  
\_L\_I\_R\_S\_P\_N\_Q\_A\_E\_R\_I\_A\_N\_Q\_T\_N\_K\_Q\_V\_N\_

MT240506|Azuay|2017|

CTCATTAGGTCTCCAAACCAAGCGGAGAGGATAGCCAACCAAACCTAACAAACAGGTGAAC  
\_L\_I\_R\_S\_P\_N\_Q\_A\_E\_R\_I\_A\_N\_Q\_T\_N\_K\_Q\_V\_N\_

MT240507|Loja|2017|B

CTCATTAGGTCTCCAAACCAAGCGGAGAGGATAGCCAACCAAACCTAACAAACAGGTGAAC  
\_L\_I\_R\_S\_P\_N\_Q\_A\_E\_R\_I\_A\_N\_Q\_T\_N\_K\_Q\_V\_N\_

MT240508|Loja|2017|B

CTCATTAGGTCTCCAAACCAAGCGGAGAGGATAGCCAACCAAACCTAACAAACAGGTGAAC

L\_I\_R\_S\_P\_N\_Q\_A\_E\_R\_I\_A\_N\_Q\_T\_N\_K\_Q\_V\_N\_

MT240509|Loja|2017|B

CTCATTAGGTCTCCAAACCAAGCGGAGAGGATAGCCAACCAAACCTAACAAACAGGTGAAC

L\_I\_R\_S\_P\_N\_Q\_A\_E\_R\_I\_A\_N\_Q\_T\_N\_K\_Q\_V\_N\_

MT240510|Loja|2017|B

CTCATAAGGTCTCCAAACCAAGCGGAGAGGATAGCCAACCAAACCTAACAAACAGGTGAAC

L\_I\_R\_S\_P\_N\_Q\_A\_E\_R\_I\_A\_N\_Q\_T\_N\_K\_Q\_V\_N\_

MT240511|Loja|2017|B

CTCATTAGGTCTCCAAACCAAGCGGAGAGGATAGCCAACCAAACCTAACAAACAGGTGAAC

L\_I\_R\_S\_P\_N\_Q\_A\_E\_R\_I\_A\_N\_Q\_T\_N\_K\_Q\_V\_N\_

MT240512|Azuay|2016|

CTCGTTCGGTCTCCAAACCAAGCGGAGAGGATAGCCAACCAAACGAACAAACAGGTGAAC

L\_V\_R\_S\_P\_N\_Q\_A\_E\_R\_I\_A\_N\_Q\_T\_N\_K\_Q\_V\_N\_

MT240513|Azuay|2016|

CTCATTCGGTCTCCAAACCAAGCGGAGAGAATAGCCAACCAAACCAACAAACAGGTGAAC

L\_I\_R\_S\_P\_N\_Q\_A\_E\_R\_I\_A\_N\_Q\_T\_N\_K\_Q\_V\_N\_

MT240514|Azuay|2016|

CTCATTCGGTCTCCAAACCAAGCGGAGAGAATAGCCAACCAAACCAACAAACAGGTGAAC

L\_I\_R\_S\_P\_N\_Q\_A\_E\_R\_I\_A\_N\_Q\_T\_N\_K\_Q\_V\_N\_

MZ490607|Tungurahua|

CTCATTAGATCCCCAAATCAAGCGGAGAGGATAGCCAATCAAACCTAACAAACAGGTGAAT

L\_I\_R\_S\_P\_N\_Q\_A\_E\_R\_I\_A\_N\_Q\_T\_N\_K\_Q\_V\_N\_

MZ490608|Tungurahua|

CTCATTAGATCCCCAAATCAAGCGGAGAGGATAGCCAACCAAACCTAACAAACAGGTGAAC

L\_I\_R\_S\_P\_N\_Q\_A\_E\_R\_I\_A\_N\_Q\_T\_N\_K\_Q\_V\_N\_

MZ490609|Tungurahua|

CTCATTAGATCTCCAAACCAAGCGGAGAGGATAGCCAACCAAACCTAACAAACAGGTGAAC

L\_I\_R\_S\_P\_N\_Q\_A\_E\_R\_I\_A\_N\_Q\_T\_N\_K\_Q\_V\_N\_

MZ490610|Tungurahua|

CTCATTAGGTCTCCTAATCAGGCGGAGAGGATAGCCAACCAAACCTAACAAACAGGTGAAC

L\_I\_R\_S\_P\_N\_Q\_A\_E\_R\_I\_A\_N\_Q\_T\_N\_K\_Q\_V\_N\_

MZ490611|Tungurahua|

CTCATTAGGTCTCCTAATCAGGCGGAGAGGATAGCCAACCAAACCTAACAAACAGGTGAAC

L\_I\_R\_S\_P\_N\_Q\_A\_E\_R\_I\_A\_N\_Q\_T\_N\_K\_Q\_V\_N\_

MZ490612|Tungurahua|

CTCATTCGGTCTCCAAACCAAGCTGAGAGGATCGCTAACCAAACCTAACAAACAGGTGAAC

L\_I\_R\_S\_P\_N\_Q\_A\_E\_R\_I\_A\_N\_Q\_T\_N\_K\_Q\_V\_N\_

OL771197|Pichincha|2

CTCATTAGATTTCCAAACCAAGCGGAGAGGATAGCCAACCAAACCTAACAAACAGGTGAAC

\_L\_I\_R\_F\_P\_N\_Q\_A\_E\_R\_I\_A\_N\_Q\_T\_N\_K\_Q\_V\_N\_

OL771198|Pichincha|2

CTCATTAGATTTCCAAACCAAGCGGAGAGGATAGCCAACCAAACCTAACAAACAGGTGAAC

\_L\_I\_R\_F\_P\_N\_Q\_A\_E\_R\_I\_A\_N\_Q\_T\_N\_K\_Q\_V\_N\_

OL771199|Pichincha|2

CTCATCAGGTCTCCAAACCAAGCGGAGAGGATAGCCAACCAAACCTAACAAACAGGTGAAC

\_L\_I\_R\_S\_P\_N\_Q\_A\_E\_R\_I\_A\_N\_Q\_T\_N\_K\_Q\_V\_N\_

OL771200|Pichincha|2

CTCATTCGGTCTCCAAACCAAGCTGAGAGGATAGCCAACCAAACCTAACAAACAGGTGAAC

\_L\_I\_R\_S\_P\_N\_Q\_A\_E\_R\_I\_A\_N\_Q\_T\_N\_K\_Q\_V\_N\_

| | | | |

MF978248|Pichincha|2

CTCTTCCAAACCGCAGCCCAGGGAAATAACTTGGCCTCCAACCTCTGCATTCATAACCAAG 600

\_L\_F\_Q\_T\_A\_A\_Q\_G\_N\_N\_L\_A\_S\_N\_S\_A\_F\_I\_T\_K\_

MT240490|Imbabura|20

CTCTTCCAAACTGCAGCCCAGGGGAATAACTTGGCCTCCAACCTCAGCGTTCATAACCAAG

\_L\_F\_Q\_T\_A\_A\_Q\_G\_N\_N\_L\_A\_S\_N\_S\_A\_F\_I\_T\_K\_

MT240491|Imbabura|20

CTCTTCCAAACTGCAGCCCAGGGGAATAACTTGGCCTCCAACCTCAGCGTTTATAACCAAG

\_L\_F\_Q\_T\_A\_A\_Q\_G\_N\_N\_L\_A\_S\_N\_S\_A\_F\_I\_T\_K\_

MT240492|Imbabura|20

CTCTTCCAAACTGCAGCCCAGGGGAATAACCTTGGCCTCCAACCTCAGCGTTTATAACCAAG

\_L\_F\_Q\_T\_A\_A\_Q\_G\_N\_N\_L\_A\_S\_N\_S\_A\_F\_I\_T\_K\_

MT240493|Imbabura|20

CTCTTCCAAACTGCAGCCCAGGGGAATAACTTGGCCTCCAACCTCAGCGTTTATAACCAAG

\_L\_F\_Q\_T\_A\_A\_Q\_G\_N\_N\_L\_A\_S\_N\_S\_A\_F\_I\_T\_K\_

MT240494|Pichincha|2

CTCTTCCAAACCGCAGCCCAGGGGAATAACTTGGCCTCGAACTCTGCATTCATAACCAAG

\_L\_F\_Q\_T\_A\_A\_Q\_G\_N\_N\_L\_A\_S\_N\_S\_A\_F\_I\_T\_K\_

MT240495|Pichincha|2

CTCTTCCAAACTGCAGCTCAGGGGAACAACCTTGGCTTCCAACCTCTGCATTCATAACCAAG

\_L\_F\_Q\_T\_A\_A\_Q\_G\_N\_N\_L\_A\_S\_N\_S\_A\_F\_I\_T\_K\_

MT240496|Tungurahua|

CTCTTCCAAACCGCAGCCCAGGGGAATAACTTGGCCTCTAACTCCGCATTCATAACCAAG

\_L\_F\_Q\_T\_A\_A\_Q\_G\_N\_N\_L\_A\_S\_N\_S\_A\_F\_I\_T\_K\_

MT240497|Tungurahua|

CTCTTCCAAACTGCAGCCCAGGGGAATAACTTTGGCCTCCAATCCGCATTCATAACCAAG  
\_L\_F\_Q\_T\_A\_A\_Q\_G\_N\_N\_L\_A\_S\_N\_S\_A\_F\_I\_T\_K\_

MT240498|Tungurahua|

CTCTTCCAAACCGCAGCCCAGGGAAATAACTTTGGCCTCCAATCCGCATTCATAACCAAG  
\_L\_F\_Q\_T\_A\_A\_Q\_G\_N\_N\_L\_A\_S\_N\_S\_A\_F\_I\_T\_K\_

MT240499|Tungurahua|

CTCTTCCAAACCGCAGCCCAGGGAAATAACTTTGGCCTCCAATCCGCATTCATAACCAAG  
\_L\_F\_Q\_T\_A\_A\_Q\_G\_N\_N\_L\_A\_S\_N\_S\_A\_F\_I\_T\_K\_

MT240500|Tungurahua|

CTCTTCCAAACCGCAGCTCAGGGAACTAACTTTGGCCTCCAATCCGCATTCATAACCAAG  
\_L\_F\_Q\_T\_A\_A\_Q\_G\_T\_N\_L\_A\_S\_N\_S\_A\_F\_I\_T\_K\_

MT240501|Tungurahua|

CTCTTCCAAACCGCAGCCCAGGGAAATAACTTTGGCCTCCAATCCGCATTCATAACCAAG  
\_L\_F\_Q\_T\_A\_A\_Q\_G\_N\_N\_L\_A\_S\_N\_S\_A\_F\_I\_T\_K\_

MT240502|Tungurahua|

CTCTTCCAAACTGCAGCTCAGGGGAACAACCTTTGGCCTCCAATCTGCATTCATAACCAAG  
\_L\_F\_Q\_T\_A\_A\_Q\_G\_N\_N\_L\_A\_S\_N\_S\_A\_F\_I\_T\_K\_

MT240503|Tungurahua|

CTCTTCCAAACCGCAGCCCAGGGAAATAACTTTGGCCTCCAATCCGCATTCATAACCAAG  
\_L\_F\_Q\_T\_A\_A\_Q\_G\_N\_N\_L\_A\_S\_N\_S\_A\_F\_I\_T\_K\_

MT240504|Tungurahua|

CTCTTCCAAACTGCAGCTCAGGGGAACAACCTTTGGCCTCCAATCTGCATTCATAACCAAG  
\_L\_F\_Q\_T\_A\_A\_Q\_G\_N\_N\_L\_A\_S\_N\_S\_A\_F\_I\_T\_K\_

MT240505|Azuay|2017|

CTCTTCCAAGCTGCTGCCCAGGGGAATAACTTTGGCTTCCAATCAGCATTCATAACCAAG  
\_L\_F\_Q\_A\_A\_A\_Q\_G\_N\_N\_L\_A\_S\_N\_S\_A\_F\_I\_T\_K\_

MT240506|Azuay|2017|

CTCTTCCAAGCTGCTGCCCAGGGGAATAACTTTGGCTTCCAATCAGCATTCATAACCAAG  
\_L\_F\_Q\_A\_A\_A\_Q\_G\_N\_N\_L\_A\_S\_N\_S\_A\_F\_I\_T\_K\_

MT240507|Loja|2017|B

CTCTTCCAAGCTGCTGCCCAGGGGAATAACTTTGGCTTCCAATCAGCATTCATAACCAAG  
\_L\_F\_Q\_A\_A\_A\_Q\_G\_N\_N\_L\_A\_S\_N\_S\_A\_F\_I\_T\_K\_

MT240508|Loja|2017|B

CTCTTCCAAGCTGCTGCCCAGGGGAATAACTTTGGCTTCCAATCAGCATTCATAACCAAG  
\_L\_F\_Q\_A\_A\_A\_Q\_G\_N\_N\_L\_A\_S\_N\_S\_A\_F\_I\_T\_K\_

MT240509|Loja|2017|B

CTCTTCCAAGCTGCTGCCCAGGGGAATAACTTTGGCTTCCAATCAGCATTCATAACCAAG

L\_F\_Q\_A\_A\_A\_Q\_G\_N\_N\_L\_A\_S\_N\_S\_A\_F\_I\_T\_K\_

MT240510|Loja|2017|B

CTCTTCCAAGCTGCTGCCCAGGGGAATAACTTTGGCTTCCAACCTCAGCATTCATAACCAAG

L\_F\_Q\_A\_A\_A\_Q\_G\_N\_N\_L\_A\_S\_N\_S\_A\_F\_I\_T\_K\_

MT240511|Loja|2017|B

CTCTTCCAAGCTGCTGCCCAGGGGAATAACTTTGGCTTCCAACCTCAGCATTCATAACCAAG

L\_F\_Q\_A\_A\_A\_Q\_G\_N\_N\_L\_A\_S\_N\_S\_A\_F\_I\_T\_K\_

MT240512|Azuay|2016|

CTCTTCCAAACTGCAGCTCAGGGAAATAACTTTGGCATCCAACCTCTGCATTCATAACCAAG

L\_F\_Q\_T\_A\_A\_Q\_G\_N\_N\_L\_A\_S\_N\_S\_A\_F\_I\_T\_K\_

MT240513|Azuay|2016|

CTCTTCCAAACTGCAGCCCAGGGGAATAACTTTGGCCTCCAATTCTGCATTCATAACCAAG

L\_F\_Q\_T\_A\_A\_Q\_G\_N\_N\_L\_A\_S\_N\_S\_A\_F\_I\_T\_K\_

MT240514|Azuay|2016|

CTCTTCCAAACTGCAGCCCAGGGGAATAACTTTGGCCTCCAATTCTGCATTCATAACCAAG

L\_F\_Q\_T\_A\_A\_Q\_G\_N\_N\_L\_A\_S\_N\_S\_A\_F\_I\_T\_K\_

MZ490607|Tungurahua|

CTCTTCCAAACCGCAGCCCAGGGGAATAACTTTGGCCTCTAACTCCGCATTCATAACCAAG

L\_F\_Q\_T\_A\_A\_Q\_G\_N\_N\_L\_A\_S\_N\_S\_A\_F\_I\_T\_K\_

MZ490608|Tungurahua|

CTCTTCCAAACCGCAGCCCAGGGGAATAACTTTGGCCTCTAACTCCGCATTCATAACCAAG

L\_F\_Q\_T\_A\_A\_Q\_G\_N\_N\_L\_A\_S\_N\_S\_A\_F\_I\_T\_K\_

MZ490609|Tungurahua|

CTCTTCCAAACCGCAGCTCAAGGGAATAACTTTGGCCTCCAACCTCCGCATTCATAACCAAG

L\_F\_Q\_T\_A\_A\_Q\_G\_N\_N\_L\_A\_S\_N\_S\_A\_F\_I\_T\_K\_

MZ490610|Tungurahua|

CTCTTCCAAGCCGCAGCCCAGGGGAACAACCTTTGGCTTCTAACTCCGCATTCATAACTAAG

L\_F\_Q\_A\_A\_A\_Q\_G\_N\_N\_L\_A\_S\_N\_S\_A\_F\_I\_T\_K\_

MZ490611|Tungurahua|

CTCTTCCAAACCGCAGCCCAGGGGAACAACCTTTGGCTTCTAACTCCGCATTCATAACCAAG

L\_F\_Q\_T\_A\_A\_Q\_G\_N\_N\_L\_A\_S\_N\_S\_A\_F\_I\_T\_K\_

MZ490612|Tungurahua|

CTCTTCCAAACTGCAGCTCAGGGGAACAACCTTTGGCCTCCAACCTCCGCATTCATAACCAAG

L\_F\_Q\_T\_A\_A\_Q\_G\_N\_N\_L\_A\_S\_N\_S\_A\_F\_I\_T\_K\_

OL771197|Pichincha|2

CTCTTCCAAGCTGCTGCCCAGGGGAATAACTTTGGCTTCCAACCTCAGCATTCATAACCAAG

L\_F\_Q\_A\_A\_A\_Q\_G\_N\_N\_L\_A\_S\_N\_S\_A\_F\_I\_T\_K\_

OL771198|Pichincha|2

CTCTTCCAAGCTGCTGCCCAGGGAAATAACTTGGCTTCCAACCTCAGCATTTCATAACCAAG

\_L\_F\_Q\_A\_A\_A\_Q\_G\_N\_N\_L\_A\_S\_N\_S\_A\_F\_I\_T\_K\_

OL771199|Pichincha|2

CTCTTCCAAACCGCGGCCAGGGGAACAACCTTGGCCTCCAACCTCCGCATTTCATAACCAAG

\_L\_F\_Q\_T\_A\_A\_Q\_G\_N\_N\_L\_A\_S\_N\_S\_A\_F\_I\_T\_K\_

OL771200|Pichincha|2

CTCTTCCAAACTGCAGCTCAGGGGAACAACCTTGGCCTCCAACCTCCGCATTTATAACCAAG

\_L\_F\_Q\_T\_A\_A\_Q\_G\_N\_N\_L\_A\_S\_N\_S\_A\_F\_I\_T\_K\_

| | | | |

MF978248|Pichincha|2 GGGCAGATTTCAACGTCCACTCCATCTATCCAGTTTCTCCCATCCCCAGAGTAG

654

\_G\_Q\_I\_S\_T\_S\_T\_P\_S\_I\_Q\_F\_L\_P\_S\_P\_E\_\*\_

MT240490|Imbabura|20

GGGCAGATCTCAACGTCCACTCCATCCATCCAGTTTCTTCCATCCCCGAGTAG

\_G\_Q\_I\_S\_T\_S\_T\_P\_S\_I\_Q\_F\_L\_P\_S\_P\_E\_\*\_

MT240491|Imbabura|20

GGGCAGATCTCAACGTCCACACCATCCATCCAGTTTCTTCCATCCCCGAGTAG

\_G\_Q\_I\_S\_T\_S\_T\_P\_S\_I\_Q\_F\_L\_P\_S\_P\_E\_\*\_

MT240492|Imbabura|20

GGGCAGATCTCAACGTCCACACCATCCATCCAGTTTCTTCCATCCCCGAGTAG

\_G\_Q\_I\_S\_T\_S\_T\_P\_S\_I\_Q\_F\_L\_P\_S\_P\_E\_\*\_

MT240493|Imbabura|20

GGGCAGGTCTCAACGTCCACTCCATCCATCCAGTTTCTTCCATCCCCGATTAG

\_G\_Q\_V\_S\_T\_S\_T\_P\_S\_I\_Q\_F\_L\_P\_S\_P\_D\_\*\_

MT240494|Pichincha|2 GGGCAAATTTCAACGTCCACTCCATCCATCCAGTTTCTTCCATCCCCGAGTAG

\_G\_Q\_I\_S\_T\_S\_T\_P\_S\_I\_Q\_F\_L\_P\_S\_P\_E\_\*\_

MT240495|Pichincha|2 GGGCAGATCTCAACTTCCACTCCATCCATCCAGTTTCTTCCATCCCCGAGTAG

\_G\_Q\_I\_S\_T\_S\_T\_P\_S\_I\_Q\_F\_L\_P\_S\_P\_E\_\*\_

MT240496|Tungurahua|

GGGCAGATCTCAACGTCCACTCCATCCATCCAGTTTCTTCCATCTCCCGAGTAG

\_G\_Q\_I\_S\_T\_S\_T\_P\_S\_I\_Q\_F\_L\_P\_S\_P\_E\_\*\_

MT240497|Tungurahua|

GGGCAGATCTCAACGTCCACTCCATCCATCCAGTTTCTTCCATCCCCGAGTAG

\_G\_Q\_I\_S\_T\_S\_T\_P\_S\_I\_Q\_F\_L\_P\_S\_P\_E\_\*\_

MT240498|Tungurahua|

GGGCAGATCTCAACGTCCACTCCATCCATCCAGTTTCTTCCATCCCCGAGTAG

\_G\_Q\_I\_S\_T\_S\_T\_P\_S\_I\_Q\_F\_L\_P\_S\_P\_E\_\*\_

MT240499|Tungurahua|

GGGCAGATCTCAACGTCCACTCCATCCATCCAGTTTCTTCCATCCCCCGAGTAG

\_G\_Q\_I\_S\_T\_S\_T\_P\_S\_I\_Q\_F\_L\_P\_S\_P\_E\_\*\_

MT240500|Tungurahua|

GGGCAGATCTCAACGTCCACTCCATCCATTCAGTTTCTTCCATCCCCCGAGTAG

\_G\_Q\_I\_S\_T\_S\_T\_P\_S\_I\_Q\_F\_L\_P\_S\_P\_E\_\*\_

MT240501|Tungurahua|

GGGCAGATCTCAACGTCCACTCCATCCATCCAGTTTCTTCCATCCCCCGAGTAG

\_G\_Q\_I\_S\_T\_S\_T\_P\_S\_I\_Q\_F\_L\_P\_S\_P\_E\_\*\_

MT240502|Tungurahua|

GGGCAGATCTCAACGTCCACTCCATCCATCCAGTTTCTTCCGTCTCCCGAGTAG

\_G\_Q\_I\_S\_T\_S\_T\_P\_S\_I\_Q\_F\_L\_P\_S\_P\_E\_\*\_

MT240503|Tungurahua|

GGGCAGATCTCAACGTCCACTCCATCCATCCAGTTTCTTCCATCCCCCGAGTAG

\_G\_Q\_I\_S\_T\_S\_T\_P\_S\_I\_Q\_F\_L\_P\_S\_P\_E\_\*\_

MT240504|Tungurahua|

GGGCAGATCTCAACGTCCACTCCATCCATCCAGTTTCTTCCGTCTCCCGAGTAG

\_G\_Q\_I\_S\_T\_S\_T\_P\_S\_I\_Q\_F\_L\_P\_S\_P\_E\_\*\_

MT240505|Azuay|2017|

GGGCAGATCTCAACGTCCACTCCATCCATCCAGTTTCTTCCATCCCCCGAGTAG

\_G\_Q\_I\_S\_T\_S\_T\_P\_S\_I\_Q\_F\_L\_P\_S\_P\_E\_\*\_

MT240506|Azuay|2017|

GGGCAGATCTCAACGTCCACTCCATCCATCCAGTTTCTTCCATCCCCCGAGTAG

\_G\_Q\_I\_S\_T\_S\_T\_P\_S\_I\_Q\_F\_L\_P\_S\_P\_E\_\*\_

MT240507|Loja|2017|B

GGGCAGATCTCAACGTCCACTCCATCCATCCAGTTTCTTCCATCCCCCGAGTAG

\_G\_Q\_I\_S\_T\_S\_T\_P\_S\_I\_Q\_F\_L\_P\_S\_P\_E\_\*\_

MT240508|Loja|2017|B

GGGCAGATCTCAGCGTCCACTCCATCCATCCAGTTTCTTCCATCCCCCGAGTAG

\_G\_Q\_I\_S\_A\_S\_T\_P\_S\_I\_Q\_F\_L\_P\_S\_P\_E\_\*\_

MT240509|Loja|2017|B

GGGCAGATCTCAACGTCCACTCCATCCATCCAGTTTCTTCCATCCCCCGAGTAG

\_G\_Q\_I\_S\_T\_S\_T\_P\_S\_I\_Q\_F\_L\_P\_S\_P\_E\_\*\_

MT240510|Loja|2017|B

GGGCAGATCTCAGCGTCCACTCCATCCATCCAGTTTCTTCCATCCCCCGAGTAG

\_G\_Q\_I\_S\_A\_S\_T\_P\_S\_I\_Q\_F\_L\_P\_S\_P\_E\_\*\_

MT240511|Loja|2017|B  
GGGCAGATCTCAACGTCCACTCCATCCATCCAGTTTCTTCCATCCCCGAGTAG  
\_G\_Q\_I\_S\_T\_S\_T\_P\_S\_I\_Q\_F\_L\_P\_S\_P\_E\_\*\_

MT240512|Azuay|2016|  
GGGCAGATCTCAACGTCCACTCCATCCATTCAGTTTCTTCCATCTCCAGAATAG  
\_G\_Q\_I\_S\_T\_S\_T\_P\_S\_I\_Q\_F\_L\_P\_S\_P\_E\_\*\_

MT240513|Azuay|2016|  
GGGCAGATCTCGACGTCCACTCCATCCATCCAGTTTCTTCCGTCTCCAGAGTAG  
\_G\_Q\_I\_S\_T\_S\_T\_P\_S\_I\_Q\_F\_L\_P\_S\_P\_E\_\*\_

MT240514|Azuay|2016|  
GGGCAGATCTCGACGTCCACTCCATCCATCCAGTTTCTTCCGTCTCCAGAGTAG  
\_G\_Q\_I\_S\_T\_S\_T\_P\_S\_I\_Q\_F\_L\_P\_S\_P\_E\_\*\_

MZ490607|Tungurahua| GGGCAGATCTCAACGTCCACTCCATCCATCCAGTTTCTTCCATCCCCA-----  
\_G\_Q\_I\_S\_T\_S\_T\_P\_S\_I\_Q\_F\_L\_P\_S\_P\_-\_-\_-

MZ490608|Tungurahua| GGGCAGATCTCAACGTCCACTCCATCCATCCAGTTTCTTCCATC-----  
\_G\_Q\_I\_S\_T\_S\_T\_P\_S\_I\_Q\_F\_L\_P\_#\_-\_-\_-

MZ490609|Tungurahua| GGGCAGATCTCAACGTCCACTCCATCCATCCAGTTTCTTCCATCCC-----  
\_G\_Q\_I\_S\_T\_S\_T\_P\_S\_I\_Q\_F\_L\_P\_S\_#\_-\_-

MZ490610|Tungurahua| GGGCAGATCTCAACGTCCACTCCATCCATCCAGTTTCTTCCATCCCCAG-----  
\_G\_Q\_I\_S\_T\_S\_T\_P\_S\_I\_Q\_F\_L\_P\_S\_P\_#\_-

MZ490611|Tungurahua| GGGCAGATCTCAACGTCCACTCCATCCATCCAGTTTCTTCCATCCC-----  
\_G\_Q\_I\_S\_T\_S\_T\_P\_S\_I\_Q\_F\_L\_P\_S\_#\_-\_-

MZ490612|Tungurahua|  
GGGCAGATCTCCACATCCACTCCATCCATCCAGTTTCTTCCATCCCCAGAATAG  
\_G\_Q\_I\_S\_T\_S\_T\_P\_S\_I\_Q\_F\_L\_P\_S\_P\_E\_\*\_

OL771197|Pichincha|2 GGGCAGATCTCAACGTCCACTCCATCCATCCAGTTTCTTCCATCCCCAGAATAG  
\_G\_Q\_I\_S\_T\_S\_T\_P\_S\_I\_Q\_F\_L\_P\_S\_P\_E\_\*\_

OL771198|Pichincha|2 GGGCAGATCTCAACGTCCACTCCATCCATCCAGTTTCTTCCATCCCCAGAATAA  
\_G\_Q\_I\_S\_T\_S\_T\_P\_S\_I\_Q\_F\_L\_P\_S\_P\_E\_\*\_

OL771199|Pichincha|2 GGGCAGATCTCAACGTCCACTCCATCCATCCAGTTTCTTCCATCCCCAGAATAG  
\_G\_Q\_I\_S\_T\_S\_T\_P\_S\_I\_Q\_F\_L\_P\_S\_P\_E\_\*\_

OL771200|Pichincha|2 GGGCAGATCTCAACGTCCACTCCATCCATCCAGTTTCTTCCATCCCCAGAATAG  
\_G\_Q\_I\_S\_T\_S\_T\_P\_S\_I\_Q\_F\_L\_P\_S\_P\_E\_\*\_

**Figure S1.** Babaco mosaic virus coat proteins alignment with the overall structure.



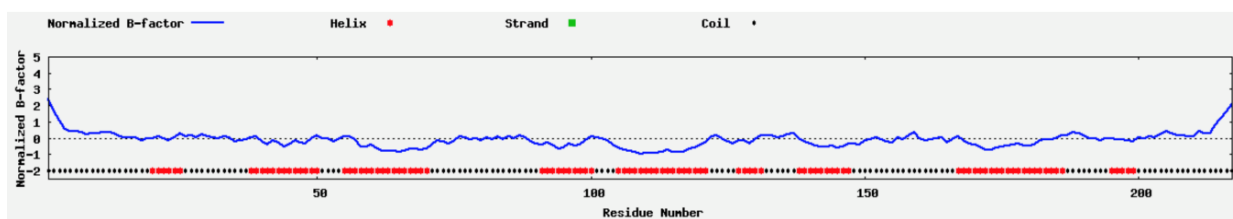

**Figure S2.** Normalized B-factor for the babaco mosaic virus coat protein model generated with I-TASSER.

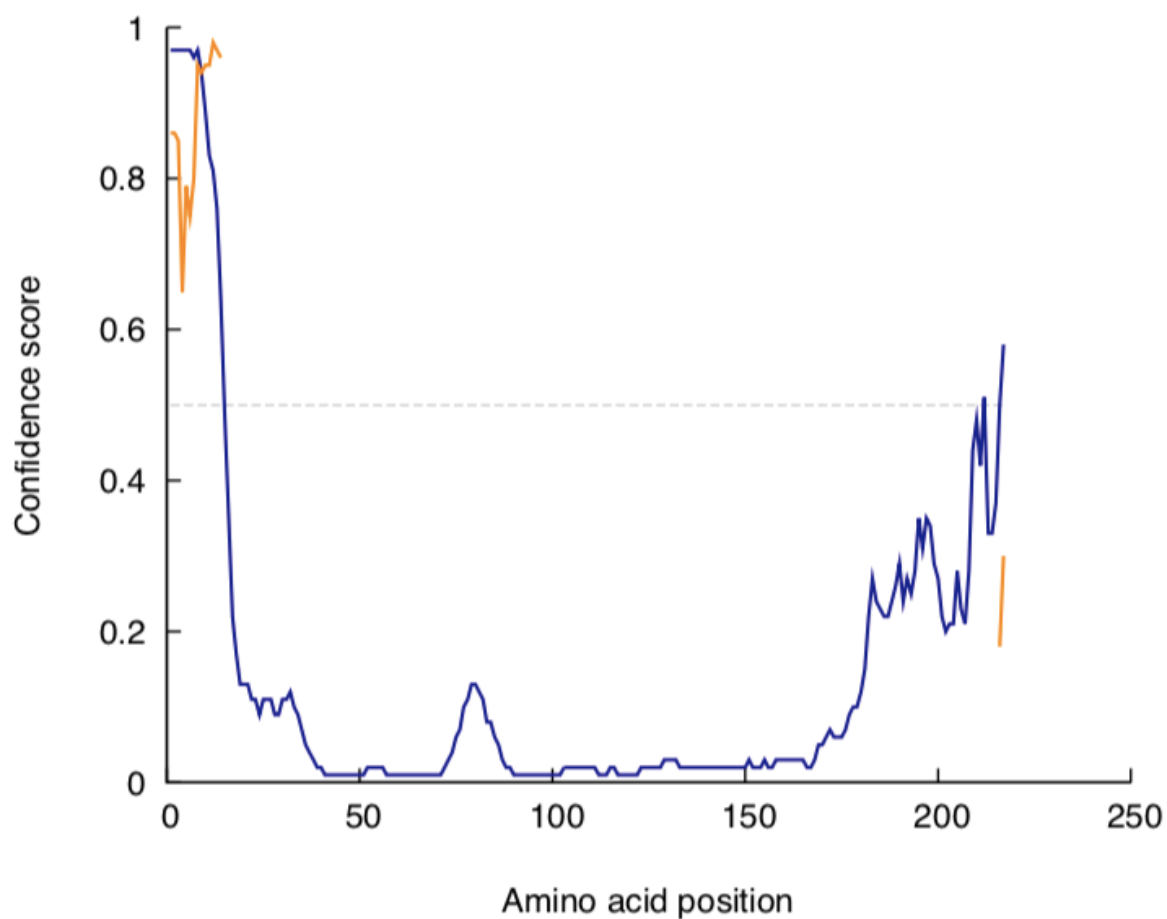

**Figure S3.** A probability estimate of the disorder per residue with DISOPRED for the coat protein of babaco mosaic virus. Both C and N terminals show prevalence of disorder, in this case an indicator of the flexibility of the BabMV CP.

**A**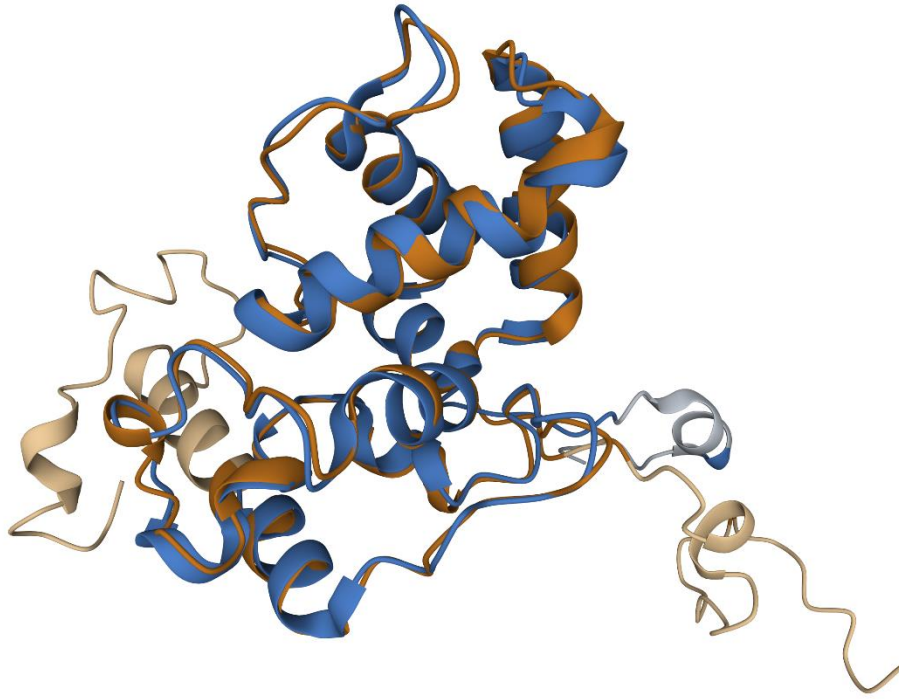**B**

|     |                                                     |     |
|-----|-----------------------------------------------------|-----|
| 1   | -----MSGKSESSN-----TGNSPFPNLTKETMASFNFKPSSNLLPS     | 37  |
| 11  | IAFPAI-----TQEQMSSIK-----VD-PTSNNLLPS               | 35  |
| 38  | EEELKTISTLLVAAKIPSASTTIVAMD LVNFCYDNGSSVYTVISGESSVT | 87  |
| 36  | QEQLKSVSTLMVAAKVPAASVTTVALELVNFCYDNGSSAYTTVTGPSSIP  | 85  |
| 88  | GVTLAQIASIVKASGTS LRKFCRFFAPVIWNLRTDKVPPANWESAGYKPT | 137 |
| 86  | EISLAQLASIVKASGTS LRKFCRYFAPIIWNLRTDKMAPANWEASGYKPS | 135 |
| 138 | EKFAAFDFFDGVENPAAMQPPGGLIRSPNQAERIANQTNKQVNL FQTAAQ | 187 |
| 136 | AKFAAFDFFDGVENPAAMQPPSGLTRSPTQEERIANATN-----        | 174 |
| 188 | GNNLASNSAFITKGQISTSTPSIQFLPSPE                      | 217 |
|     | -----                                               |     |

**Figure S4.** Three-dimensional (A) and sequence (B) alignment between the coat proteins of babaco mosaic virus (orange) and papaya mosaic virus (blue).

**Table S1.** Structure quality assessment with ERRAT for the babaco mosaic virus coat protein

| Protein | Overall Quality Factor before molecular dynamics | Overall Quality Factor after molecular dynamics (%) |           |           |
|---------|--------------------------------------------------|-----------------------------------------------------|-----------|-----------|
|         |                                                  | Cluster 1                                           | Cluster 2 | Cluster 3 |
| CP      | 76.442                                           | 95.939                                              | 97.980    | 97.423    |

**Table S2.** Structure quality assessment with Verify 3D for the babaco mosaic virus coat protein

| Protein | 3D-1D score $\geq 0.2$ , before molecular dynamics (%) | 3D-1D score $\geq 0.2$ , after molecular dynamics (%) |           |           |
|---------|--------------------------------------------------------|-------------------------------------------------------|-----------|-----------|
|         |                                                        | Cluster 1                                             | Cluster 2 | Cluster 3 |
| CP      | 55.700                                                 | 95.939                                                | 97.980    | 97.423    |

**Table S3.** Structure quality assessment with ProCheck for the babaco mosaic virus coat protein. Ramachandran plot residue analysis

|                                       | Core (%) | Allowed (%) | Generous (%) | Disallowed (%) |
|---------------------------------------|----------|-------------|--------------|----------------|
| Residues by class before MD           | 86.1     | 11.8        | 0            | 2.1            |
| Residues by class after MD- Cluster 1 | 88.8     | 9.1         | 1.1          | 1.1            |
| Residues by class after MD-Cluster 2  | 88.2     | 11.2        | 0            | 0.5            |
| Residues by class after MD-Cluster 3  | 88.8     | 9.1         | 1.1          | 1.1            |

**Table S4.** Predicted linear epitopes of the coat proteins of BabMV and PapMV

| <b>BabMV</b> |       |     |                                   |                    |       |
|--------------|-------|-----|-----------------------------------|--------------------|-------|
| N°           | Start | End | Peptide                           | Number of residues | Score |
| 1            | 1     | 26  | MSGKSESSNTGNSPFPNLTKETMASF        | 26                 | 0.869 |
| 2            | 185   | 217 | AAQGNNLASNSAFITKGQISTSTPSIQFLPSPE | 33                 | 0.804 |
| 3            | 46    | 57  | TLLVAAKIPSAS                      | 12                 | 0.720 |
| 4            | 81    | 90  | SGESSVTGVT                        | 10                 | 0.660 |
| 5*           | 121   | 125 | TDKVP                             | 5                  | 0.575 |
| 6*           | 128   | 139 | NWESAGYKPTEK                      | 12                 | 0.528 |
| 7*           | 157   | 168 | PPGGLIRSPNQA                      | 12                 | 0.515 |
| <b>PapMV</b> |       |     |                                   |                    |       |
| N°           | Start | End | Peptide                           | Number of residues | Score |
| 1            | 11    | 28  | IAFPAITQEQMSSIKVDP                | 18                 | 0.884 |
| 2*           | 154   | 174 | QPPSGLTRSPTQEERIANATN             | 21                 | 0.660 |
| 3*           | 120   | 137 | DKMAPANWEASGYKPSAK                | 18                 | 0.659 |
| 4            | 73    | 91  | SAYTTVTGPSSIPEISLAQ               | 19                 | 0.630 |

\*: common structural linear epitope region in BabMV and PapMV. Score is defined as a protrusion index value (PI) averaged over epitope residues.

**Table S5.** Predicted discontinuous epitopes of the coat proteins of BabMV and PapMV

| <b>BabMV</b> |                                                                                                                                                                                                                                                                                |                    |       |
|--------------|--------------------------------------------------------------------------------------------------------------------------------------------------------------------------------------------------------------------------------------------------------------------------------|--------------------|-------|
| N°           | Residues                                                                                                                                                                                                                                                                       | Number of residues | Score |
| 1            | A:M1, A:S2, A:G3, A:K4, A:S5, A:E6, A:S7, A:S8, A:N9, A:T10, A:G11, A:N12, A:S13, A:P14, A:F15, A:P16, A:N17, A:L18, A:T19, A:K20, A:E21, A:T22, A:M23, A:A24, A:S25, A:F26, A:N27                                                                                             | 27                 | 0.855 |
| 2            | A:F182, A:A185, A:A186, A:Q187, A:G188, A:N189, A:N190, A:L191, A:A192, A:S193, A:N194, A:S195, A:A196, A:F197, A:I198, A:T199, A:K200, A:G201, A:Q202, A:I203, A:S204, A:T205, A:S206, A:T207, A:P208, A:S209, A:I210, A:Q211, A:F212, A:L213, A:P214, A:S215, A:P216, A:E217 | 34                 | 0.797 |
| 3            | A:K42, A:T43, A:T46, A:L47, A:L48, A:V49, A:A50, A:A51, A:K52, A:I53, A:P54, A:S55, A:A56, A:S57, A:I60, A:S81, A:G82, A:E83, A:S84, A:S85, A:V86, A:T87, A:G88, A:V89, A:T90, A:Q93                                                                                           | 26                 | 0.671 |

| 4*                                                                                                                                                                  | A:T121, A:D122, A:K123, A:V124, A:P125, A:W129, A:E130,<br>A:S131, A:A132, A:G133, A:Y134, A:K135, A:P136, A:T137,<br>A:E138, A:K139, A:L161, A:I162, A:R163, A:S164, A:P165,<br>A:N166, A:Q167, A:A168, A:I171                                                                                                               | 25                    | 0.547 |
|---------------------------------------------------------------------------------------------------------------------------------------------------------------------|-------------------------------------------------------------------------------------------------------------------------------------------------------------------------------------------------------------------------------------------------------------------------------------------------------------------------------|-----------------------|-------|
| <b>PapMV</b>                                                                                                                                                        |                                                                                                                                                                                                                                                                                                                               |                       |       |
| N°                                                                                                                                                                  | Residues                                                                                                                                                                                                                                                                                                                      | Number of<br>residues | Score |
| 1*                                                                                                                                                                  | A:D120, A:K121, A:M122, A:A123, A:P124, A:A125, A:N126,<br>A:W127, A:E128, A:A129, A:S130, A:G131, A:Y132, A:K133,<br>A:P134, A:S135, A:A136, A:K137, A:Q154, A:P155, A:P156,<br>A:S157, A:G158, A:L159, A:T160, A:R161, A:S162, A:P163,<br>A:T164, A:Q165, A:E166, A:E167, A:R168, A:I169, A:A170,<br>A:A172, A:T173, A:N174 | 38                    | 0.667 |
| 2                                                                                                                                                                   | A:I11, A:A12, A:F13, A:P14, A:A15, A:I16, A:T17, A:Q18,<br>A:E19, A:Q20, A:M21, A:S22, A:S23, A:I24, A:K25, A:V26,<br>A:D27, A:P28                                                                                                                                                                                            | 18                    | 0.884 |
| 3                                                                                                                                                                   | A:S73, A:A74, A:Y75                                                                                                                                                                                                                                                                                                           | 3                     | 0.563 |
| 4                                                                                                                                                                   | A:T76, A:T77, A:V78, A:T79, A:G80, A:P81, A:S82, A:S83,<br>A:I84, A:P85, A:E86, A:I87, A:S88, A:A90, A:Q91, A:S94                                                                                                                                                                                                             | 16                    | 0.652 |
| 5                                                                                                                                                                   | A:T44, A:L45, A:V47, A:A48, A:A49, A:K50, A:V51, A:P52,<br>A:A53, A:A54, A:S55                                                                                                                                                                                                                                                | 11                    | 0.738 |
| *: common structural region of discontinuous antibody epitope in BabMV and PapMV. Score is defined as a protrusion index value (PI) averaged over epitope residues. |                                                                                                                                                                                                                                                                                                                               |                       |       |
